# A Mademoiselle domain binding platform links the key RNA transporter to endosomes

Senthil-Kumar Devan<sup>1,§</sup>, Stephan Schott-Verdugo<sup>2,3,§</sup>, Kira Müntjes<sup>1</sup>, Lilli Bismar<sup>1</sup>, Jens Reiners<sup>4</sup>, Eymen Hachani<sup>5</sup>, Lutz Schmitt<sup>5</sup>, Astrid Höppner<sup>4</sup>, Sander HJ Smits<sup>4,5,\*</sup>, Holger Gohlke<sup>2,3,\*</sup>, Michael Feldbrügge<sup>1,\*</sup>

§ shared first authorship

\* shared corresponding authorship

<sup>1</sup> Institute of Microbiology, Heinrich Heine University Düsseldorf, Cluster of Excellence on Plant Sciences, 40204 Düsseldorf, Germany

<sup>2</sup> John von Neumann Institute for Computing (NIC), Jülich Supercomputing Centre (JSC), Institute of Biological Information Processing (IBI-7: Structural Bioinformatics), and Institute of Bio- and Geosciences (IBG-4: Bioinformatics), Forschungszentrum Jülich GmbH, Wilhelm-Johnen-Str., 52425 Jülich, Germany

<sup>3</sup> Institute for Pharmaceutical and Medicinal Chemistry, Heinrich Heine University Düsseldorf, 40204 Düsseldorf, Germany

<sup>4</sup> Center for Structural Studies, Heinrich Heine University Düsseldorf, 40204 Düsseldorf, Germany

<sup>5</sup> Institute of Biochemistry I, Heinrich Heine University Düsseldorf, 40204 Düsseldorf, Germany

**Running title:** A novel MLLE platform

**Key words:** Endosome / PAM2 / Poly(A)-binding protein / RNA transport / *Ustilago maydis*

**\* Corresponding authors:**

**Dr. Sander HJ Smits**

Institute of Biochemistry,

Heinrich Heine University Düsseldorf, 40204 Düsseldorf, Germany

Phone: +49 (211) 81-12647

sander.smits@hhu.de

**Dr. Holger Gohlke**

Institute for Pharmaceutical and Medicinal Chemistry,  
Heinrich Heine University Düsseldorf, 40204 Düsseldorf, Germany

Phone: +49 (211) 81-13662

&

John von Neumann Institute for Computing (NIC), Jülich Supercomputing Centre (JSC),  
Institute of Biological Information Processing (IBI-7: Structural Bioinformatics), and Institute  
of Bio- and Geosciences (IBG-4: Bioinformatics), Forschungszentrum Jülich GmbH, 52425  
Jülich, Germany

Phone: +49 (2461) 61-85550

[gohlke@uni-duesseldorf.de](mailto:gohlke@uni-duesseldorf.de) & [h.gohlke@fz-juelich.de](mailto:h.gohlke@fz-juelich.de)

**Dr. Michael Feldbrügge**

Institute of Microbiology,  
Bioeconomy Science Center, Cluster of Excellence on Plant Sciences  
Heinrich Heine University Düsseldorf, 40204 Düsseldorf, Germany

Phone: +49 (211) 81-15475

[feldbrue@hhu.de](mailto:feldbrue@hhu.de)

## 1 **Abstract**

2 Spatiotemporal expression can be achieved by transport and translation of mRNAs at defined  
3 subcellular sites. An emerging mechanism mediating mRNA trafficking is microtubule-  
4 dependent co-transport on shuttling endosomes. Although progress has been made in  
5 identifying various components of the endosomal mRNA transport machinery, a mechanistic  
6 understanding of how these RNA-binding proteins are connected to endosomes is still lacking.  
7 Here, we demonstrate that a flexible Mademoiselle (MLLE) domain platform within RNA-  
8 binding protein Rrm4 of *Ustilago maydis* is crucial for endosomal attachment. Our  
9 structure/function analysis uncovered three MLLE domains at the C-terminus of Rrm4 with a  
10 functionally defined hierarchy. MLLE3 recognises two PAM2-like sequences of the adaptor  
11 protein Upa1 and is essential for endosomal shuttling of Rrm4. MLLE1 and MLLE2 are most  
12 likely accessory domains exhibiting a variable binding mode for interaction with currently  
13 unknown partners. Thus, endosomal attachment of the mRNA transporter is orchestrated by a  
14 sophisticated MLLE domain binding platform.

## 15 **Introduction**

16 mRNA localisation and local translation are essential for spatiotemporal control of protein  
17 expression. An important mechanism to achieve localised translation is the active transport of  
18 mRNAs along the cytoskeleton (Das *et al.*, 2021; Fernandopulle *et al.*, 2021; Mofatteh &  
19 Bullock, 2017). Mainly, long-distance transport of mRNA is mediated by motor-dependent  
20 movement along microtubules. Transport endosomes are important carriers that move  
21 messenger ribonucleoprotein complexes (mRNPs), consisting of RNA-binding proteins and  
22 cargo mRNAs on their cytoplasmic surface (Mofatteh & Bullock, 2017; Müntjes *et al.*, 2021;  
23 Niessing *et al.*, 2018). This process is evolutionarily conserved in fungi, plants, and animals  
24 (Baumann *et al.*, 2012; Cioni *et al.*, 2019; Tian *et al.*, 2020a; Liao *et al.*, 2019; Müntjes *et al.*,  
25 2021; Quentin *et al.*, 2021; Schuhmacher *et al.*, 2021). In endosperm cells of developing rice  
26 seeds, cargo mRNAs are transported to the cortical endoplasmic reticulum ER by the action of  
27 the two RNA recognition motif (RRM)-containing proteins RBP-P and RBP-L. These form a  
28 quaternary complex with membrane trafficking factor NSF (*N*-ethylmaleimide-sensitive factor)  
29 and small GTPase Rab5a on the endosomal surface (Tian *et al.*, 2020b). In neurons, mRNA  
30 transport has been linked to early and late endosomes as well as lysosomal vesicles. Especially,  
31 local translation of mRNAs encoding mitochondrial proteins on the surface of late endosomes  
32 is needed for mitochondrial function. Importantly, this trafficking process has been associated  
33 with the neuronal Charcot Marie-Tooth disease (Cioni *et al.*, 2019). Annexin 11, a factor  
34 implicated in amyotrophic lateral sclerosis (ALS), was found as an mRNP linker on motile  
35 lysosomal vesicles (Liao *et al.*, 2019). Also, the five-membered FERRY complex was recently  
36 identified connecting mRNAs encoding mitochondrial proteins to neuronal endosomes by  
37 interaction with the active form of Rab5 (Quentin *et al.*, 2021; Schuhmacher *et al.*, 2021).

38 Among the best-studied examples for membrane-coupled mRNA transport is the  
39 endosomal mRNA transport in the corn pathogen *Ustilago maydis* (Béthune *et al.*, 2019; Haag  
40 *et al.*, 2015; Müntjes *et al.*, 2021). Extensive peripheral movement of mRNAs is needed for  
41 efficient unipolar growth of infectious hyphae. These hyphae grow highly polarised by  
42 expanding at the growing tip and inserting regularly spaced septa at the basal pole. Loss of  
43 mRNA distribution causes aberrant bipolar growth (Baumann *et al.*, 2012; Becht *et al.*, 2006;  
44 Pohlmann *et al.*, 2015). Key vehicles of cargo mRNAs are Rab5a-positive endosomes that  
45 shuttle along microtubules by the concerted action of plus-end directed kinesin-3 and minus-  
46 end directed cytoplasmic dynein (Baumann *et al.*, 2012). Important cargo mRNAs are, for  
47 example, all four septin mRNAs. Their local translation during transport is essential to form  
48 heteromeric septin complexes on the surface of transport endosomes. Endosomes deliver these

49 complexes to the hyphal tip, forming a defined gradient of septin filaments at the growing pole  
50 (Baumann *et al.*, 2014; Olgeiser *et al.*, 2019; Zander *et al.*, 2016).

51 Rrm4 is the key RNA-binding protein of the transport process that recognises defined sets  
52 of cargo mRNAs via its three N-terminal RRM domains (Fig. 1A; Olgeiser *et al.*, 2019). Rrm4 and  
53 bound cargo mRNAs are linked to endosomes by Upa1, containing a FYVE zinc finger for  
54 interaction with PI3P lipids (phosphatidylinositol 3-phosphate; Fig 1A; Pohlmann *et al.*, 2015;  
55 Stenmark *et al.*, 2002). The adaptor protein Upa1 contains a PAM2 motif (poly[A]-binding  
56 protein interacting motif 2; Albrecht & Lengauer, 2004; Jinek *et al.*, 2010; Kozlov *et al.*, 2004)  
57 and two PAM2-like (PAM2L) sequences. These motifs are crucial for interaction with  
58 Mademoiselle (MLLE) domains of the poly(A)-binding protein Pab1 and Rrm4, respectively  
59 (Fig. 1A; Pohlmann *et al.*, 2015).

60 The MLLE domain was first identified as a conserved domain at the C-terminus of the  
61 human cytoplasmic poly(A)-binding protein 1 (PABP1C; Mangus *et al.*, 1998; Mangus *et al.*,  
62 2003). Solution and crystal structures of PABC domains from PABP1C and ubiquitin ligase  
63 UBR5 showed that they are structurally conserved (Deo *et al.*, 2001; Kozlov *et al.*, 2001). The  
64 domain is about 70 amino acids in length and consists of five bundled  $\alpha$ -helices. Interaction  
65 with the PAM2-binding motif (consensus sequence xxLNxxAxEFxP) is characterised by the  
66 central  $\alpha$ -helix 3 with the sequence KITGMLLE and mediated by two adjacent hydrophobic  
67 pockets (Xie *et al.*, 2014), with the binding of the Phe residue of the PAM2 motif being the  
68 major determinant for this interaction (Kozlov & Gehring, 2010). Besides human PABP1C,  
69 there are currently only two additional proteins with MLLE domains described: the ubiquitin  
70 ligase UBR5 functioning, for example, during microRNA-mediated gene silencing (Su *et al.*,  
71 2011) and Rrm4-type RNA-binding proteins from fungi (Fig. 1B; Müller *et al.*, 2019).

72 Mutations in the C-terminal MLLE domain of Rrm4 result in the loss of Rrm4 motility,  
73 suggesting that the link to endosomes is disrupted (Becht *et al.*, 2006). Consistently, the C-  
74 terminus of Rrm4 recognises the PAM2L sequence of the adaptor protein Upa1 (Pohlmann *et al.*,  
75 2015), suggesting that the interaction of MLLE domains with PAM2L sequences is  
76 responsible for its endosome association. This study combines structural biology with fungal  
77 genetics to demonstrate that the C-terminal half of Rrm4 has three divergent MLLE domains  
78 with a flexible arrangement and each domain contributes differentially to the endosomal  
79 attachment.

80

## 81 **Results**

### 82 **Iterative structural modelling predicts three MLLE domains at the C-terminus of Rrm4**

83 To generate structural models of the MLLE domains present in Rrm4, we focused on the C-  
84 terminal part of the protein (residues 421 to 792). This excluded the three N-terminal RRM  
85 but included the previously predicted two C-terminal MLLE domains (Fig. 1A-B; Müller *et al.*,  
86 2019). Subjecting this Rrm4 sequence region to iterative comparative modelling with  
87 TopModel (Fig. 1C; Mulnaes *et al.*, 2020a) revealed, as expected, the previously identified two  
88 regions with homology for MLLE domains located at residues 571-629 and 712-791 (denoted  
89 MLLE2 and MLLE3; Fig. 1C; Müller *et al.*, 2019). Unexpectedly, using the TopModel  
90 workflow with its efficient template selection capabilities (Mulnaes *et al.*, 2020a), we identified  
91 an additional *de novo* predicted MLLE domain located at residues 451-529 (denoted MLLE1;  
92 Fig. 1B-C; Fig. EV1A). Although the sequence identity between templates and their respective  
93 Rrm4 sequence stretches is only 17 to 32% (Fig. 1B, Fig. EV1A), the generated MLLE domain  
94 models have a high predicted local structural quality, as assessed by TopScore (Fig. 1C;  
95 Mulnaes & Gohlke, 2018). The generated models were also verified by the current deep neural  
96 network modelling approaches AlphaFold2 and RoseTTAFold (Fig. EV1B; Baek *et al.*, 2021;  
97 Jumper *et al.*, 2021), further indicating that the C-terminal half of Rrm4 has three MLLE  
98 domains instead of the previously identified two. All of these MLLE domains might be relevant  
99 for the interaction with Upa1.

### 100 **X-ray analysis of the second MLLE domain confirms the predicted structural models**

101 To verify the structural models further, we expressed and purified an N-terminally truncated  
102 version of the Rrm4 carrying the three MLLE domains in *Escherichia coli* (Fig. EV2A-B;  
103 version H-Rrm4-NT4 carrying an N-terminal hexa-histidine-tag; Pohlmann *et al.*, 2015;  
104 Materials and methods). Size exclusion chromatography combined with Multi-angle light  
105 scattering (MALS) indicates that the protein is homogenous and does not form aggregates (Fig.  
106 EV2C). We thus set out to crystallize the protein for X-ray diffraction analysis (see Material  
107 and Methods). Testing 2016 different conditions, crystals were only obtained in individual  
108 cases after at least 7 days of incubation. A complete dataset was collected from a single crystal  
109 diffracting to 2.6 Å resolution and a P4<sub>3</sub>2<sub>1</sub>2 symmetry. Data and refinement statistics are given  
110 in Appendix Table S2. Surprisingly, the unit cell dimensions were small and, with a Matthews  
111 coefficient assuming 50% solvent content, only 128 amino acids would fit into the asymmetric  
112 unit of the crystal. Hence, the unit cell has an insufficient size to cover H-Rrm4-NT4, which

113 contains 380 amino acids. Using the predicted models of MLLE1-3 as templates for molecular  
114 replacement, only MLLE2 gave a clear solution, showing after refinement that two copies of  
115 MLLE2 (residues 567-630) were present in the asymmetric unit. For comparison, previously,  
116 two copies of the MLLE domain in the asymmetric unit were reported in crystals of MLLE of  
117 UBR5 (Munoz-Escobar *et al.*, 2015). The structural data indicates that the protein was truncated  
118 from both termini during crystallisation, resulting in a shortened version of the H-Rrm4-NT4  
119 protein that formed stable crystals (see Material and methods). Both MLLE2<sup>Rrm4</sup> copies adopt  
120 the same overall fold as seen by the RMSD of 0.29 Å over 59 C-alpha atoms. The MLLE2<sup>Rrm4</sup>  
121 crystal structure displays high similarity with the MLLE domain of the ubiquitin ligase UBR5  
122 (MLLE<sup>UBR5</sup>; Munoz-Escobar *et al.*, 2015; PDB code 3NTW, RMSD of 0.97 Å over 56 amino  
123 acids) and the MLLE domain of PABPC1 (Kozlov *et al.*, 2010; PDB code 3KUS, RMSD of  
124 1.34 Å over 61 amino acids). The MLLE2<sup>Rrm4</sup> domain consists of four helices (designated  $\alpha$  -  
125 5; Fig. 2A) arranged as a right-handed superhelix similar to MLLE<sup>UBR5</sup>. In comparison to the  
126 MLLE domain of PABPC1, the first short helix is absent in both MLLE2<sup>Rrm4</sup> and MLLE<sup>UBR5</sup>  
127 structures.

128 When comparing the obtained crystal structure with the MLLE2<sup>Rrm4</sup> model generated by  
129 TopModel, the average RMSD is 0.62 Å over the backbone atoms, close to the uncertainty of  
130 the atomic coordinates of the experimental structure (Fig. 2B). Importantly, this confirms our  
131 structural model of MLLE2<sup>Rrm4</sup> and strongly suggests that the modelled MLLE1<sup>Rrm4</sup> and  
132 MLLE3<sup>Rrm4</sup> domains should be of equally high quality.

133 We compared the predicted models of MLLE1-3<sup>Rrm4</sup> with the known structure of the human  
134 PABPC1 focusing on the well-described PAM2 peptide-binding pocket. This revealed that  
135 MLLE3<sup>Rrm4</sup> maintains a characteristic Gly residue at position 736 that binds the conserved Phe  
136 residue of the PAM2 motifs, a major binding determinant in PABPC1 and UBR5 (Kozlov &  
137 Gehring, 2010; Munoz-Escobar *et al.*, 2015; Fig. 2C). However, the binding interfaces of  
138 MLLE1<sup>Rrm4</sup> and MLLE2<sup>Rrm4</sup> are altered compared to the ‘canonical’ binding site in PABPC1  
139 and UBR5 (Fig. 2C). Instead of Gly, MLLE1<sup>Rrm4</sup> and MLLE2<sup>Rrm4</sup> have a Ser and Arg in the  
140 corresponding positions 471 and 573. The notion that MLLE1<sup>Rrm4</sup> and MLLE2<sup>Rrm4</sup> may differ  
141 from canonical MLLE domains is also supported by the lower sequence identity of MLLE1<sup>Rrm4</sup>  
142 and MLLE2<sup>Rrm4</sup> when compared to previously characterised MLLE domains (Fig. 1B; EV1A).  
143 In summary, structural modelling revealed the presence of three MLLE domains at the C-  
144 terminus of Rrm4. Furthermore, the structure of the MLLE2<sup>Rrm4</sup> domain was successfully  
145 verified by X-ray crystallographic analysis. MLLE1<sup>Rrm4</sup> and MLLE2<sup>Rrm4</sup> are divergent in the

146 key region of PAM2 binding, suggesting that these domains might employ a different binding  
147 mode or show a different binding specificity.

### 148 **The MLLE domains of Rrm4 form a binding platform with flexible arrangement of the** 149 **individual domains**

150 To study the relative arrangement of all three MLLE<sup>Rrm4</sup> domains and the orientation to the N-  
151 terminal RRMs, we performed Small-Angle X-ray Scattering (SAXS) experiments. We  
152 expressed and purified H-Rrm4-NT4 as well as the full-length protein with N-terminal GST  
153 fusion (glutathione S-transferase; G-Rrm4) from *E. coli* (see Materials and methods). Primary  
154 data analysis of the scattering curves (Tria *et al.*, 2015; Konarev *et al.*, 2003) revealed that both  
155 proteins are monomeric and highly flexible in solution (Appendix Table S3; Fig. 2D-E; Fig.  
156 EV2D-E). To visualise the different protein conformations, we performed an Ensemble  
157 Optimization Method (EOM) analysis for both the G-Rrm4 and H-Rrm4-NT4 proteins (Fig 2D-  
158 E). We used our MLLE models and a GST model (PDB entry: 1ua5) together with the protein  
159 sequence for G-Rrm4 as input, yielding a distribution of different conformations of the protein  
160 in solution (representative models in Fig. EV2E). One model of G-Rrm4, representing 25% of  
161 the population, revealed that the C-terminal part containing MLLE1-3<sup>Rrm4</sup> adopts an elongated  
162 and mainly unfolded but open conformation (Fig. 2D; Fig. EV2D-E). The N-terminal part,  
163 containing RRM domains of the GST fusion protein, adopts a more globular structure,  
164 indicating less flexibility within this region (Fig. 2D; Fig. EV2D-E). Studying only the C-  
165 terminal part of Rrm4 revealed that the most prominent model of this analysis (75 % of the  
166 population) has a nearly identical conformation as the one selected for G-Rrm4 (Fig. 2D-E, Fig.  
167 EV2E). It suggests that the C- terminal part of Rrm4-NT4 adopts a very similar orientation  
168 when expressed by itself. This analysis deduces that the MLLE1-3<sup>Rrm4</sup> domains form a C-  
169 terminal binding platform with a flexible arrangement for multiple contact sites for binding  
170 partners. Thus, the RRM domains for RNA interaction is spatially separated from the protein  
171 interaction platform.

### 172 **The third MLLE is essential for interaction with PAM2 like sequences of Upa1**

173 To evaluate the interaction capacity of MLLE1-3<sup>Rrm4</sup>, we performed *in vitro* binding studies.  
174 We expressed different deletion versions of Rrm4 as N-terminal GST fusions in *E. coli*. As a  
175 control, we expressed an N-terminal GST fusion of the MLLE domain of Pab1 (Fig. 3A;  
176 Materials and methods). To check the physical interaction with PAM2 and PAM2L sequences  
177 of Upa1, we expressed 18 amino acid fragments (Fig. 3A) as N-terminal hexa-histidine-SUMO  
178 (HS) fusion proteins (see Materials and methods). In GST pull-down experiments using GST



179 fusion proteins as bait, G-Pab1-MLLE interacts with HS-PAM2 but not with the HS-PAM2L  
180 motifs of Upa1 (Fig. EV3B, lane 2). Conversely, G-Rrm4-NT4 recognises the two HS-PAM2L  
181 motifs of Upa1 but not the HS-PAM2 motif (Fig. EV3B, lane 3; Pohlmann *et al.*, 2015).  
182 Interestingly, the interaction with both PAM2L motifs was lost when MLLE3<sup>Rrm4</sup> was deleted  
183 (G-Rrm4-NT4-M3Δ; Fig. EV3B, lane 6), while constructs with deletion of MLLE1<sup>Rrm4</sup> or  
184 MLLE2<sup>Rrm4</sup>, or both MLLE1<sup>Rrm4</sup> and MLLE2<sup>Rrm4</sup>, still interacted with the HS-PAM2L motifs  
185 of Upa1 (Fig. EV3B, lane 4,5 and 7).

186 To validate qualitatively whether these results also hold true for full-length proteins, we  
187 performed yeast two-hybrid experiments comparable to previous studies (Pohlmann *et al.*,  
188 2015). To this end, Upa1 or Rrm4 versions were fused at the N-terminus with the DNA-binding  
189 domain (BD) and activation domain (AD) of Gal4p, respectively (see Materials and methods;  
190 the C-termini were fused with the enhanced version of the green fluorescent protein [Gfp],  
191 Clontech; or the monomeric version of red fluorescent protein mKate2 [Kat], respectively;  
192 Müntjes *et al.*, 2020; Pohlmann *et al.*, 2015). Rrm4-Kat interacts with full-length Upa1-Gfp  
193 (Fig. EV3C, Pohlmann *et al.*, 2015) and interaction was lost when MLLE3<sup>Rrm4</sup> was deleted.  
194 Mutations in MLLE1<sup>Rrm4</sup>, MLLE2<sup>Rrm4</sup> or MLLE1,2<sup>Rrm4</sup> did not alter the interaction with Upa1-  
195 Gfp (Fig. EV3C). To further investigate the presence of unknown interaction motifs in Upa1-  
196 Gfp, variants carrying block mutations in either or both PAM2L1 and PAM2L2 motifs were  
197 tested against the Rrm4-Kat versions (Fig. EV3C). Upa1-Gfp versions with block mutations in  
198 either PAM2L1 or PAM2L2 still interact with the Rrm4-Kat versions (Fig. EV3C). However,  
199 when both PAM2L1,2 motifs were mutated, the interaction between the Upa1 and Rrm4 is lost,  
200 comparable to earlier observation (Fig. EVC; Pohlmann *et al.*, 2015). Invariably, MLLE3<sup>Rrm4</sup>  
201 deletion caused loss of interaction with all Upa1-Gfp versions (Fig. EV3C). These results  
202 confirm that the MLLE3<sup>Rrm4</sup> domain is essential for the interaction with Upa1. MLLE1<sup>Rrm4</sup> and  
203 MLLE2<sup>Rrm4</sup> appear to be dispensable for the interaction with Upa1 suggesting the presence of  
204 additional interaction partners (see below).

205 To obtain quantitative data on the protein/peptide interactions, we performed isothermal  
206 titration calorimetry (ITC) experiments with purified proteins (Fig. EV3D) and synthetic  
207 peptides with a length of 18 amino acids (PAM2<sup>Upa1</sup>, PAM2L1<sup>Upa1</sup>, and PAM2L2<sup>Upa1</sup>; Fig. 3A).  
208 The binding constant  $K_D$  and the binding stoichiometry was calculated from the curves, which  
209 in all cases indicated a 1:1 ratio between the G-Rrm4-NT4 protein and the binding partner.

210 Testing G-Pab1-MLLE with the peptides revealed a  $K_D$  of 14.6  $\mu$ M for PAM2<sup>Upa1</sup> (Fig.  
211 EV3D), which is within the range of observed  $K_D$  of 0.2 to 40  $\mu$ M for known MLLE/PAM2  
212 interactions like the MLLE domain of PABPC1 with various PAM2 sequences (Mattijssen *et*

213 *al.*, 2021). Testing G-Pab1-MLLE with PAM2L1<sup>Upa1</sup> and PAM2L2<sup>Upa1</sup> peptides, no indication  
214 for binding was observed. PAM2L sequences are rich in acidic residues and exhibit a different  
215 FxxP spacing than the canonical FxP sequence of PAM2 sequences in the core region (Fig. 3A,  
216 EV3D; see Discussion). The observed binding behaviour indicates a clear binding specificity  
217 differentiating PAM2 and PAM2L peptides. This is in line with the previously published GST  
218 pull-down experiments (Pohlmann *et al.*, 2015).

219 In comparison, testing G-Rrm4-NT4 with the peptides revealed a  $K_D$  of 14.9  $\mu$ M for  
220 PAM2L1<sup>Upa1</sup> and 5.1  $\mu$ M for PAM2L2<sup>Upa1</sup> and no binding to PAM2<sup>Upa1</sup> (Fig. 3B). This suggests  
221 a similar affinity when compared to the interactions of MLLE<sup>Pab1</sup> with PAM2 and demonstrates  
222 the high sequence specificity of the MLLE domains to their respective PAM2L sequences (see  
223 Discussion).

224 Analysing G-Rrm4-NT4-M3 $\Delta$  with a deletion of MLLE3<sup>Rrm4</sup> revealed that binding to  
225 PAM2L1<sup>Upa1</sup> and PAM2L2<sup>Upa1</sup> was no longer detectable (Fig. 3C). This is in line with  
226 observations from the GST pull-down experiments (Fig. EV3B). This suggests that MLLE3<sup>Rrm4</sup>  
227 is essential for binding. Testing G-Rrm4-NT4 versions carrying deletions in either MLLE1<sup>Rrm4</sup>  
228 or MLLE2<sup>Rrm4</sup> showed no difference in binding affinity (Fig. EV3F-G). Even testing G-Rrm4-  
229 NT4 with a deletion in both MLLE1,2 domains deleted exhibited a binding affinity in the same  
230 range as the wild type version containing all three MLLEs (Fig. 3D). We conclude that (i)  
231 MLLE3<sup>Rrm4</sup> is vital for recognising PAM2L sequences with a higher affinity to PAM2L2 and  
232 (ii) neither MLLE1<sup>Rrm4</sup> nor MLLE2<sup>Rrm4</sup> contribute to the binding of PAM2L or PAM2 motifs  
233 (Fig. EV3H-I, see Materials and methods). This is consistent with our structural analysis  
234 revealing a differences in the binding site for these MLLE domains (see Discussion).

235

### 236 **The third MLLE domain of Rrm4 is essential for its function**

237 To address how the different MLLE domains contribute to the biological function of Rrm4, we  
238 generated *U. maydis* strains carrying deletions in the respective domains of Rrm4 (Fig. 4A). As  
239 genetic background, we used laboratory strain AB33, expressing the heteromeric master  
240 transcription factor of hyphal growth (bE/bW) under control of the nitrate inducible promoter  
241 *Pnar1*. Thereby, polar hyphal growth can be elicited efficiently and in a highly reproducible  
242 fashion by changing the nitrogen source (Fig. 4B, top; Brachmann *et al.*, 2001). To investigate  
243 dynamic endosomal transport, we used strains expressing functional C-terminal fusion Upa1-  
244 Gfp and Rrm4-Kat (see Materials and methods).

245 The resulting hyphae grew with a defined axis of polarity, i.e., they expanded at the hyphal  
246 tip and inserted basal septa leading to the formation of empty sections (Fig. 4B-C). Loss of  
247 Rrm4 (*rrm4Δ* strain) caused the formation of hyphae growing at both ends, characteristic for  
248 aberrant bipolar growth (Fig. 4B-C; Pohlmann *et al.*, 2015). Testing Rrm4-Kat versions  
249 carrying deletions of MLLE1<sup>Rrm4</sup> or MLLE2<sup>Rrm4</sup> did not cause alterations in unipolar growth  
250 (Fig. 4B-C). Furthermore, endosomal shuttling and co-localisation were indistinguishable from  
251 wild type (Fig. 4D-E). Also, the number of endosomes (number of signals / 10 μm, Fig. EV4A),  
252 velocity, and processivity (Fig. EV4B-C) were comparable to wild type. Hence, the first two  
253 MLLE domains were dispensable for polar growth and endosomal shuttling under optimal  
254 growth conditions. Since the deletion of the first two MLLEs did not substantially alter the  
255 function of Rrm4, we can infer that the deletion neither affects the overall structure of the  
256 protein nor interfere with other domains like the RNA-binding domain of the protein. This  
257 supports the conclusions of our biochemical experiments (see above).

258 Importantly, testing strains expressing Rrm4-Kat with deletion of the third MLLE domain  
259 revealed a loss-of-function phenotype similar to *rrm4Δ* strains. The number of bipolar hyphae  
260 was comparable to *rrm4Δ* strains (Fig. 4B-C; mutation identical to allele *rrm4G<sup>PA</sup>* in Becht *et*  
261 *al.*, 2006). We observed drastic alteration in shuttling, and Rrm4 aggregates did not co-localise  
262 with motile Upa1-positive signals (Fig. 4D-E). While the Rrm4 signals were static (Fig. 4D-E;  
263 Fig. EV4A-C), the number of motile Upa1-Gfp positive endosomes, their velocity, and their  
264 processivity were not affected (Fig. EV4A-C, summarised in Fig. EV4D). This is consistent  
265 with previous results showing that the third MLLE domain is important for the movement of  
266 Rrm4 and that endosomal shuttling of Upa1 is not affected if Rrm4 is missing (Baumann *et al.*,  
267 2012; Becht *et al.*, 2006; Pohlmann *et al.*, 2015). To conclude, MLLE3<sup>Rrm4</sup> is an essential  
268 domain for Rrm4 attachment to endosomes in contrast to MLLE1 and MLLE2<sup>Rrm4</sup>.

269

## 270 **The second MLLE domain plays accessory roles in endosomal Rrm4 attachment**

271 To investigate the biological role of MLLE1<sup>Rrm4</sup> and MLLE2<sup>Rrm4</sup> in more detail, we generated  
272 strains expressing Rrm4-M1,2Δ-Kat, lacking both MLLE1<sup>Rrm4</sup> and MLLE2<sup>Rrm4</sup> domains, and  
273 tested the influence on hyphal growth. Unipolar growth was not disturbed (Fig. 5A-B). To  
274 challenge the endosomal attachment of Rrm4, we expressed Upa1-Gfp versions carrying  
275 mutations in PAM2L motif 1 or 2 as well as in both motifs; these motifs are important for Rrm4  
276 interaction (Fig. 4A; Pohlmann *et al.*, 2015). Strains expressing Rrm4-M1,2Δ-Kat in  
277 combination with mutated PAM2L1 or PAM2L2 of Upa1 showed unipolar growth comparable

278 to wild type (Fig. 5A-B; Fig. EV5A-B), indicating that MLE1<sup>Rrm4</sup> and MLE2<sup>Rrm4</sup> are  
279 dispensable for unipolar growth even when the endosomal attachment was weakened by  
280 expressing Upa1 versions with mutated PAM2L motifs (Fig. EV4D). When studying Upa1  
281 mutated in both PAM2L motifs, we observed an aberrant bipolar growth phenotype comparable  
282 to the *upa1*Δ strain (Fig. 5A-B). This was expected, since the interaction of Rrm4 to endosomes  
283 is mediated by both PAM2L motifs (Pohlmann *et al.*, 2015). Analysing Rrm4-M1,2Δ-Kat in  
284 this genetic background revealed no additive phenotype (Fig. 5A-B). This reinforces that the  
285 interactions of PAM2L motifs of Upa1 are the major determinants for endosomal attachment  
286 of Rrm4.

287 Next, we investigated endosomal shuttling. In strains expressing Rrm4-M1,2Δ-Kat missing  
288 MLE1<sup>Rrm4</sup> and MLE2<sup>Rrm4</sup> endosomal shuttling was not disturbed (Fig. 5C). The number of  
289 motile Rrm4-M1,2Δ-Kat positive signals, their velocity, and their processivity were not  
290 affected (Fig. EV5C-D). Like above, we challenged the endosomal attachment of Rrm4 by  
291 expressing Upa1 versions with mutations in the PAM2L motifs. As expected, simultaneous  
292 mutation of both PAM2L motifs of Upa1 resulted in a reduction in the number of Rrm4-Kat  
293 positive shuttling endosomes (Fig. 5C, EV5E; Pohlmann *et al.*, 2015). When both PAM2L  
294 motifs were mutated, the Rrm4-Kat version is mislocalised and aberrantly attached to  
295 microtubules (MT) in about 80% of hyphae (Fig. 5C-D). This mislocalisation is a characteristic  
296 feature for altered endosomal attachment of Rrm4 due to the accumulation of static Rrm4-Kat,  
297 which can be also seen in *upa1*Δ strains (Fig. EV5C; Jankowski *et al.*, 2019). Quantifying  
298 Rrm4-Kat signals exhibiting processive movement in kymographs revealed that strains  
299 exhibiting aberrant microtubule staining resulted in reduced fluorescence (Fig. 5E) indicating  
300 fewer Rrm4-Kat versions on shuttling endosomes. As an important control, we treated the  
301 strains with the microtubule inhibitor benomyl, demonstrating aberrant staining is microtubule-  
302 dependent (Fig. EV5F). Furthermore, Western blot analysis demonstrated that mutations in  
303 Rrm4 do not alter the protein amount (Fig. EV5G). Comparable to previous reports, we  
304 observed residual motility of Rrm4-Kat on shuttling endosomes if both PAM2L motifs are  
305 mutated or if *upa1* is deleted (Fig. 5C). This indicates additional proteins besides Upa1 are  
306 involved in the endosomal attachment of Rrm4 (Pohlmann *et al.*, 2015).

307 To analyse the influence of individual PAM2L motifs, we determined the number of  
308 hyphae with aberrant microtubule staining in strains co-expressing Rrm4-Kat versions and an  
309 Upa1-Gfp version with mutations of PAM2L sequence 1 or 2. Mutations in PAM2L1 and  
310 PAM2L2 causes 8% and 19% of hyphae with aberrant MT staining, respectively (Fig. 5D).  
311 Hence, the interaction of PAM2L2 is more important for correct endosomal attachment of

312 Rrm4. This is consistent with our biochemical results demonstrating that MLLE3<sup>Rrm4</sup> binds  
313 stronger to PAM2L2 of Upa1 than to PAM2L1 (Fig. 3D).

314 Next, we investigated the association of Rrm4-M1,2Δ-Kat in strains expressing Upa1 with  
315 mutated PAM2L1. In this strain, the endosomal attachment was solely dependent on the  
316 interaction of MLLE3<sup>Rrm4</sup> with the PAM2L2 sequence of Upa1. We did observe 6% of hyphae  
317 with aberrant MT staining (Fig. 5D; Fig. EV4D). This was comparable to strains expressing  
318 Rrm4-Kat, suggesting no clear difference (Fig. 5D). However, testing Upa1 with its PAM2L2  
319 mutated, leaving only PAM2L1 for interaction with Rrm4, we observed a clear increase in  
320 hyphae with aberrant MT staining when comparing strains co-expressing Rrm4-M1,2Δ-Kat  
321 versus Rrm4-Kat (52% versus 19%; Fig. 5D-E). Hence, the region covering MLLE1<sup>Rrm4</sup> and  
322 MLLE2<sup>Rrm4</sup> was important for Rrm4 attachment. Finally, we tested individual deletions in  
323 MLLE1<sup>Rrm4</sup> and MLLE2<sup>Rrm4</sup> in combination with mutated PAM2L2 in Upa1 to dissect the role  
324 of the different MLLE domains. In strains expressing Rrm4-Kat or Rrm4-M1Δ-Kat with this  
325 type of Upa1 mutation, the number of hyphae with aberrant MT staining was comparable (18%  
326 versus 11%, respectively; Fig. 5D). However, strains expressing Rrm4-M2Δ-Kat exhibited an  
327 increased number of hyphae with aberrant MT staining that was comparable to Rrm4-M1,2Δ-  
328 kat (51% versus 52% respectively; Fig. 5D; Fig. EV4D). As mentioned above, aberrant MT  
329 localisation of mutated Rrm4-M2Δ-Kat and Rrm4-M1,2Δ-Kat also exhibited reduced intensity  
330 of processive signals in Rrm4 kymographs (Fig. 5E) suggesting that the endosomal association  
331 was altered. To conclude, for MLLE1<sup>Rrm4</sup> we were unable to assign a clear function yet.  
332 However, MLLE2<sup>Rrm4</sup> plays an accessory role in the endosomal attachment of Rrm4. In  
333 essence, the C-terminus of Rrm4 contains three MLLE domains, with MLLE2<sup>Rrm4</sup> fulfilling an  
334 accessory role and MLLE3<sup>Rrm4</sup> having an essential function during the attachment of mRNPs  
335 to endosomes.

336

## 337 **Discussion**

338 Combining structural biology and biophysical techniques with fungal genetics and cell biology,  
339 we addressed how mRNPs can be mechanistically linked to endosomes in the model fungus *U.*  
340 *maydis*. Previously, it was found that the C-terminal MLLE domain of Rrm4 is needed for  
341 shuttling (Becht *et al.*, 2006) and that the C-terminus of Rrm4 interacts with two PAM2L motifs  
342 of Upa1 (Pohlmann *et al.*, 2015). Now, we demonstrate that this region of Rrm4 contains not  
343 only two MLLE domains, but a sophisticated binding platform consisting of three MLLE  
344 domains with MLLE2 and MLLE3 functioning in linking the key RNA transporter to  
345 endosomes. We disclose a strict hierarchy with main and accessory domain. The accessory

346 MLLE2 domain shows variations in the critical region of the predicted PAM2 binding pocket,  
347 suggesting a novel mode of interaction with currently unknown interaction partners. Rrm4  
348 represents the first protein containing multiple MLLE domains to form a binding platform to  
349 the best of our knowledge. This interaction unit is essential for the correct endosomal  
350 attachment and, hence, mRNP trafficking.

### 351 **The MLLE / PAM2 connection**

352 The founding member of the MLLE domain family is present at the C-terminus of the poly(A)-  
353 binding protein PABPC1. This domain interacts with PAM2 motifs of numerous interaction  
354 partners such as GW182, eRF3, and the RNA-binding protein LARP4 functioning in  
355 microRNA biology, translational termination, and posttranscriptional control, respectively  
356 (Jinek *et al.*, 2010; Kozlov & Gehring, 2010; Yang *et al.*, 2011). Structural analysis revealed a  
357 common mode of binding, where the Leu and particularly the Phe of the PAM2 consensus motif  
358 xxL<sub>N</sub>xxAxEFxP (Fig. EV3A) are interacting with helix 2 and 3 as well as helix 3 and 5 of  
359 MLLE domain, respectively (Kozlov & Gehring, 2010; Xie *et al.*, 2014). Indeed, the interaction  
360 of MLLE with a hydrophobic amino acid is highly conserved, which in most cases is Phe with  
361 a known exception in the variant PAM2w motif of LARP4 and LARP4A, where Trp is found  
362 (Fig. EV3A; Grimm *et al.*, 2020; Yang *et al.*, 2011; Xie *et al.*, 2014).

363 Studying the MLLE domain-containing protein Rrm4, we discover that it has three MLLE  
364 domains in its C-terminal half. MLLE3<sup>Rrm4</sup> binds PAM2L motifs of Upa1 with a  $K_D$  of 5 and  
365 15  $\mu$ M for PAM2L2<sup>Upa1</sup> and PAM2L1<sup>Upa1</sup>, respectively. The binding affinities are in the same  
366 range as described for other MLLE/PAM2 interactions: for example, the binding of  
367 MLLE<sup>PABPC1</sup> with PAM2<sup>LARP1</sup>, PAM2<sup>Tob2-125</sup>, PAM2<sup>LARP4</sup> exhibit a  $K_D$  of 3.8, 16 and 22  $\mu$ M,  
368 respectively (Mattijssen *et al.*, 2021). Importantly, our biophysical assessment confirms the  
369 exquisite binding specificity of MLLE<sup>Rrm4</sup> that recognises PAM2L1<sup>Upa1</sup> and PAM2L2<sup>Upa1</sup> but  
370 not the PAM2<sup>Upa1</sup> version. PAM2L sequences contain a stretch of acidic amino acids in the N-  
371 terminal half, and the spacing of FxxP in the core sequence is altered (Fig. EV3A). These  
372 variations might account for the differential binding mode. Visual inspection of the potential  
373 PAM2L binding region in the predicted model revealed that MLLE3<sup>Rrm4</sup> contains a Gly at  
374 position 736 to sustain the binding of an aromatic residue of PAM2L as described for other  
375 MLLE domains (see above). However, we were unable to uncover the structural basis for the  
376 sequence specificity. Towards this end, future structural studies are required to provide detailed  
377 information on the interaction of MLLE3<sup>Rrm4</sup> with PAM2L sequences.

378 Differential PAM2 binding has also been described for the MLLLE<sup>UBR5</sup>. This MLLLE domain  
379 interacts with PAM2<sup>PAlP</sup> with an affinity of 3.4  $\mu$ M (Lim *et al.*, 2006), whereas it binds a  
380 PAM2L sequence (Fig. EV3A) in its own HECT domain with lower affinity ( $K_D$  of 50  $\mu$ M).  
381 The latter interaction has been implicated in regulating the HECT ligase activity (Munoz-  
382 Escobar *et al.*, 2015). Interestingly, the PAM2L sequence within the HECT domain of UBR5  
383 is highly similar to the PAM2L1 and -2 of Rrm4: (i) the sequences contain an acidic stretch N-  
384 terminal to the conserved Phe (Fig. EV3A), (ii) the distance between Phe and Pro is two instead  
385 of one amino acid, and (iii) the PAM2L sequence contains an additional bulky Tyr in close  
386 vicinity to the Phe residue. Remarkably, MLLLE<sup>PABC1</sup> does not recognise the PAM2L sequence  
387 of UBR5 (Munoz-Escobar *et al.*, 2015). In essence, although the strong sequence specificity of  
388 MLLLE<sup>Rrm4</sup> and MLLLE<sup>Pab1</sup> from *U. maydis* is, to the best of our knowledge, so far unique, we  
389 hypothesise that differential PAM2 and PAM2L interactions are evolutionarily conserved and  
390 might be more widespread than currently anticipated.

391 We also observed a clear binding specificity for MLLLE<sup>Pab1</sup> from *U. maydis* that interacts  
392 with PAM2<sup>Upa1</sup> but not the PAM2L sequences from Upa1 (Fig. 6). MLLLE<sup>Pab1</sup> binds with  
393 comparable affinity to the PAM2<sup>Upa1</sup> ( $K_D$  of about 14  $\mu$ M, Fig EV3E). Previously, we showed  
394 that mutations in PAM2<sup>Upa1</sup> strongly decreased MLLLE<sup>Pab1</sup> binding but did not interfere with the  
395 endosomal shuttling of Pab1 (Pohlmann *et al.*, 2015). Thus, there might be other members of  
396 the endosomal mRNPs interacting with Pab1 and stabilising its endosomal association. In fact,  
397 the dimerising scaffold protein Upa2 of endosomal mRNA transport contains four PAM2  
398 motifs offering eight potential PAM2 motifs for interaction with Pab1 (Fig. 6). However,  
399 mutating all four PAM2 motifs did not interfere with endosomal mRNA transport, although  
400 interaction with MLLLE<sup>Pab1</sup> was lost (Jankowski *et al.*, 2019), confirming a potential redundancy.  
401 Consistently, mutations in PAM2 of human LARP4B did not interfere with the function of  
402 stress granule recruitment, suggesting additional factors in this case (Grimm *et al.*, 2020).

403 Studying the other two MLLLE domains of Rrm4 revealed that both lack the canonical Gly  
404 for interactions with PAM2 or PAM2L sequences. MLLLE1<sup>Rrm4</sup> and MLLLE2<sup>Rrm4</sup> have Ser471  
405 and Arg573 instead, respectively. Consistently, MLLLE1<sup>Rrm4</sup> and MLLLE2<sup>Rrm4</sup> do not bind PAM2  
406 or PAM2L sequences. Thus, although the general fold of the MLLLE domain is probably  
407 conserved in MLLLE1<sup>Rrm4</sup> and MLLLE2<sup>Rrm4</sup>, these domains most likely exhibit a different binding  
408 specificity to their potential protein partner. Our detailed *in vivo* analysis revealed that MLLLE2  
409 carries out an accessory function for the correct attachment of Rrm4 during endosomal  
410 shuttling. In the case of MLLLE1 we did not identify a clear function so far. However, we believe  
411 that all three MLLLE domains are functionally important. This is supported by the fact that the

412 presence of an MLLE binding platform with three MLLE domains is evolutionarily conserved.  
413 Even Rrm4 versions of the distantly related fungus *Rhizophagus irregularis* contains three  
414 MLLE domains (Mucoromycota, determined by AlphaFold; Müller *et al.*, 2019).

415 Studying the spatial arrangement of the three MLLE domains revealed that they form a  
416 highly flexible binding platform pertinent for the regulation of Rrm4 mRNP transport. This  
417 would allow for the simultaneous interaction of several binding partners and potential  
418 rearrangements like an induced fit after binding. Such a scenario might be crucial during the  
419 loading and unloading of mRNPs to endosomes. Noteworthy, the N-terminal RNA-binding  
420 domain consisting of three RRM s is clearly separated from the MLLE domains for endosomal  
421 attachment. This is comparable with the arrangement of RRM and MLLE domains in human  
422 PABPC1: the four N-terminal RRM domains interact with the poly(A) tail of mRNAs, and a  
423 flexible spacer region exposes the MLLE domain for protein/protein interactions (Schäfer *et al.*  
424 *et al.*, 2019). Within the spacer region, additional interactions with the RRM2 of PABPC1 were  
425 found, suggesting a function in multimerization of the protein on the poly(A) tail of mRNAs  
426 (Sawazaki *et al.*, 2018).

## 427 **Conclusion**

428 Endosomal mRNA transport is evolutionarily highly conserved. Besides hyphal growth in  
429 fungi, it is important for endosperm development in plants as well as neuronal functions in  
430 animals and humans (Béthune *et al.*, 2019; Fernandopulle *et al.*, 2021; Müntjes *et al.*, 2021;  
431 Tian *et al.*, 2020a). Malfunctioning of this process causes defects in polar growth in fungi and  
432 has been implicated in neuronal diseases such as Charcot-Marie-Tooth type 2B neuropathy or  
433 amyotrophic lateral sclerosis in humans (Cioni *et al.*, 2019; Liao *et al.*, 2019).

434 A key question is how mRNPs are linked to endosomes. In plants, two RRM-type RNA-binding  
435 proteins form a complex with cargo mRNAs and the endosomal component *N*-ethylmaleimide-  
436 sensitive factor NSF as well as Rab5a (Tian *et al.*, 2018; Tian *et al.*, 2020a; Tian *et al.*, 2020b).  
437 Comparably, the FERRY complex (Five-subunit Endosomal Rab5 and RNA/ribosome  
438 intermediarY) interacts with the activated GTP-bound form of Rab5 during endosomal mRNA  
439 transport in neurons (Schuhmacher *et al.*, 2021; Quentin *et al.*, 2021). Further examples are the  
440 membrane-associated protein Annexin 11 that links large RNA granules to lysosomal vesicles  
441 during mRNA transport in neuronal axons and dendrites (Liao *et al.*, 2019). Thus, a number of  
442 components and interactions are known, however detailed structural insights are scarce. Here,  
443 we have demonstrated that in hyphae, endosomal attachment of Rrm4 is mediated by an MLLE  
444 binding platform with a non-canonical accessory domain joining an essential MLLE domain



Devan, Schott-Verdugo *et al.*

445 for perfect interaction to Upa1 on the endosomal surface (Fig. 6). This binary interaction in the  
446 core of the transport mRNPs is supported by numerous interactions of additional protein  
447 partners such as Upa2 and Pab1 that assist in attaching components to the endosomal surfaces  
448 (Fig. 6). In closing, studying endosomal mRNP transport in fungal model systems might guide  
449 future research endeavours in plant and neuronal systems.

## 450 **Materials and methods**

### 451 **Structural modelling of C-terminal MLLE domains of Rrm4**

452 To obtain structural models of the C-terminal region of Rrm4, an iterative homology modelling  
453 approach was used with the TopModel workflow (Mulnaes *et al.*, 2020a). Initially, the entire  
454 C-terminal region (421 to 792) was submitted as input in TopModel and identified templates  
455 for MLLE3<sup>Rrm4</sup> (665 – 791 AA; Fig. 1C, Fig. EV1A). Then, the rest of the C-terminal part  
456 comprising amino acids 421 to 664 was resubmitted as input identifying other templates as a  
457 new starting point for the MLLE2<sup>Rrm4</sup> (571-629). Likewise, the remaining C-terminal sequence  
458 comprising amino acids 421 to 549 was resubmitted as input, identifying other templates as a  
459 new starting point for the MLLE1<sup>Rrm4</sup> (446-530). In total, this led to the identification of three  
460 MLLE domains, for which structural models were generated using default TopModel  
461 parameters. The quality of the structural models was assessed with TopScore (Mulnaes &  
462 Gohlke, 2018).

### 463 **Plasmids, strains, and growth conditions**

464 For molecular cloning of plasmids, *Escherichia coli* Top10 cells (ThermoFisher C404010) and  
465 for recombinant protein expression *E. coli* *Lobstr* cells (Kerafast EC1002) were used  
466 respectively. Sequence encoding H-Rrm4-NT4 was inserted into the pET22 vector (Merck  
467 69744) with an N-terminal hexa-histidine tag for crystallisation studies. Sequence encoding  
468 MLLE variants were inserted into the pGEX-2T vector (Merck GE28-9546-53) containing GST  
469 sequence in N-terminus for pulldown and ITC experiments. Sequence encoding PAM2 variants  
470 were inserted into the Champion pET-Sumo vector (ThermoFisher K30001). pRarepLys  
471 plasmid was co-transformed in *E. coli* *Lobstr* strain to supplement the rare codons for efficient  
472 recombinant protein production. *E. coli* transformation, cultivation, and plasmid isolation were  
473 conducted using standard techniques. For yeast two-hybrid analyses *S. cerevisiae* strain AH109  
474 (Matchmaker 3 system, Clontech) was used. Yeast cells were transformed and cultivated using  
475 standard techniques. All *U. maydis* strains are derivatives of AB33, in which hyphal growth can  
476 be induced by switching the nitrogen source in the medium (Brachmann *et al.*, 2001). *U. maydis*  
477 yeast cells were incubated in complete medium (CM) supplemented with 1% glucose, whereas  
478 hyphal growth was induced by changing to nitrate minimal medium (NM) supplemented with  
479 1% glucose, both at 28°C (Brachmann *et al.*, 2001). Detailed growth conditions and general  
480 cloning strategies for *U. maydis* are described elsewhere (Baumann *et al.*, 2012; Brachmann *et*  
481 *al.*, 2004; Terfrüchte *et al.*, 2014). All plasmids were verified by sequencing. Strains were

482 generated by transforming progenitor strains with linearised plasmids. Successful integration  
483 of constructs was verified by diagnostic PCR and by Southern blot analysis (Brachmann *et al.*,  
484 2004). For ectopic integration, plasmids were linearised with *SspI* and targeted to the *ip<sup>S</sup>* locus  
485 (Loubradou *et al.*, 2001). A detailed description of all plasmids, strains, and oligonucleotides is  
486 given in Appendix Tables S3–S9. Sequences are available upon request.

#### 487 **Recombinant protein expression and purification**

488 *E. coli* cells from freshly transformed plates were inoculated in 20 ml expression media. In  
489 order to produce high-density expression cultures with tight regulation of induction and  
490 expression in shake flasks we designed a complex media inspired by the principle of Studier's  
491 autoinduction media (Studier, 2005). We use adequate amount of glucose to prevent the  
492 unintended induction and leaky expression of target protein as well as phosphate buffer to  
493 prevent acidity as a result of glucose metabolism from the excessive glucose in the media. In  
494 addition, the medium contained glycerol, nitrogen, sulphur, and magnesium for promoting  
495 high-density growth. Unlike the Studier's autoinduction media our media lack lactose therefore  
496 expression can be induced with IPTG and expressed at required temperature (Studier, 2005; 1.6  
497 % Trypton, 1% Yeast extract, 50 mM Na<sub>2</sub>HPO<sub>4</sub>, 50 mM KH<sub>2</sub>PO<sub>4</sub>, 25 mM [NH<sub>4</sub>]<sub>2</sub>SO<sub>4</sub>, 0.5%  
498 Glycerol, 0.5% Glucose, 2 mM MgSO<sub>4</sub>) with ampicillin (100 mg/ml) and chloramphenicol (34  
499 mg/ml) or kanamycin (200 mg/ml) and chloramphenicol (34 mg/ml) and grown overnight (16  
500 hours) at 37 °C, 200 rpm. Note that the high concentration of kanamycin was used to prevent  
501 the unintended resistance promoted by high phosphate concentration (Studier, 2005).  
502 Supernatant from the overnight culture was removed by centrifugation at 4 °C, 5000 × g for 2  
503 minutes. Cells were resuspended in fresh media with a starting OD<sub>600</sub> of 0.1 and grown at 37  
504 °C, 200 rpm for about 2 hours 30 minutes until the OD<sub>600</sub> = 1. Protein expression was induced  
505 at 28 °C, 200 rpm, for 4 hours by addition of 1 mM IPTG, and harvested by centrifugation at  
506 4°C, 6,000 × g for 5 minutes. Protein purification was performed as per the previous report  
507 (Abts *et al.*, 2013). Hexa-histidine tagged protein was purified using Nickle-based affinity  
508 chromatography (HisTrap HP, GE Healthcare) on Akta prime FPLC system. Cells were thawed  
509 on ice and resuspended in buffer A (20 mM HEPES pH 8.0, 200 mM NaCl, 1 mM EDTA, 10  
510 mM Imidazole pH 8.0; 1 mM PMSF, 0.5 mg/ml Lysozyme, 0.5 mg/ml DNase, 1mM β  
511 mercaptoethanol [β-ME]). Subsequently, cells were lysed by sonication on ice and centrifuged  
512 at 4 °C 18,000 × g for 30 minutes. Resulting supernatant was loaded on to a pre-equilibrated  
513 column with buffer B (20 mM HEPES pH 8.0, 200 mM NaCl, 10 mM Imidazole), washed with  
514 buffer C (20 mM HEPES pH 8.0, 200 mM NaCl, 50 mM Imidazole, 1 mM β-ME), eluted with

515 buffer D (20 mM HEPES pH 8.0, 200 mM NaCl, 300 mM Imidazole, 1mM  $\beta$ -ME) and further  
516 purified by Size Exclusion Chromatography (HiLoad 26/600 Superdex 200, GE Healthcare),  
517 pre-equilibrated with buffer E (20 mM HEPES pH 8.0, 200 mM NaCl, 1 mM  $\beta$ -ME). For  
518 crystallisation studies, H-Rrm4-NT4 was purified as above except that the buffers were  
519 prepared with high salt (500 mM NaCl) and without  $\beta$ -ME.

520 GST-tagged protein was purified using Glutathione-based affinity chromatography (GSTrap  
521 FF GE Healthcare). Cells were thawed on ice and resuspended in Buffer F (20 mM HEPES pH  
522 8.0, 200 mM NaCl, 1 mM EDTA, pH 8.0; 1 mM PMSF, 0.1 mg/ml Lysozyme, 1 mM  $\beta$ -ME).  
523 Subsequently, cells were lysed by sonication on ice and centrifuged at 4 °C, 18,000 g for 30  
524 minutes. The resulting supernatant was loaded onto a pre-equilibrated column with buffer E (20  
525 mM HEPES pH 8.0, 200 mM NaCl, 1 mM  $\beta$ -ME) and washed with the same buffer, eluted  
526 with buffer H (20 mM HEPES pH 8.0, 200 mM NaCl, 10 mM reduced glutathione, 1 mM  $\beta$ -  
527 ME), and further purified by size exclusion chromatography (HiLoad 16/600 Superdex 200 GE  
528 Healthcare), pre-equilibrated with buffer E. Protein purity was analysed on SDS-PAGE. All the  
529 purified proteins were concentrated, centrifuged at 4°C, 100,000  $\times$  g for 30 minutes, quantified  
530 by Nanodrop A280, aliquoted, and stored at -80°C. Peptides for ITC experiments were custom-  
531 synthesised and purchased from Genscript, USA (see Fig. 3A for peptide sequence).

### 532 **GST pull-down experiments**

533 Pull-down assays were performed as per the previous report (Jankowski *et al.*, 2019). In short,  
534 GST-MLLE variants and HS-PAM2 variants were expressed in *E. coli*. Cell pellets from 50 ml  
535 *E. coli* expression culture were resuspended in 10 ml buffer F (20 mM HEPES pH 8.0, 200 mM  
536 NaCl, 1 mM EDTA; 0.5% Nonidet P-40, 1 mM PMSF, 0.1 mg/ml Lysozyme). Cells were lysed  
537 by sonication on ice and centrifuged at 4 °C, 16,000  $\times$  g for 10 minutes. 1 mL of the resulting  
538 supernatant was incubated for 1 hour at 4°C on constant agitation of 1,000 rpm with 100  $\mu$ L  
539 glutathione sepharose (GS) resin (GE Healthcare), pre-equilibrated in buffer F. The GS resin  
540 was washed three times with 1 ml of buffer G (20 mM HEPES pH 8.0, 200 mM NaCl, 1 mM  
541 EDTA, 0.5 % Nonidet P-40). Subsequently, supernatant of HS-PAM2 variants was added to  
542 the GST-MLLE variant bound resins and incubated for 1 hour at 4 °C on agitation. The resins  
543 were washed as aforementioned, resuspended in 100  $\mu$ L of 2x Laemmli loading buffer, boiled  
544 for 10 minutes at 95 °C and analysed by western blotting.

545 ***Ustilago maydis* cell disruption and sample preparation for immunoblotting**

546 *U. maydis* hyphae were induced as described earlier (see Plasmids, strains, and growth  
547 conditions). 50 ml of hyphal cells (6 h.p.i) were harvested in a 50 ml conical centrifuge tubes  
548 by centrifugation at  $7,150 \times g$ , for 5 minutes. Cell pellets were resuspended in 2 ml phosphate  
549 buffered saline pH 7.0 (PBS; 137 mM NaCl, 2.7mM KCl, 8 mM Na<sub>2</sub>HPO<sub>4</sub> and 2 mM KH<sub>2</sub>PO<sub>4</sub>)  
550 and transferred to a 2 ml centrifuge tubes. Cells were harvested at  $7,150 \times g$  for 5 minutes and  
551 supernatant was removed completely. The resulting cell pellets were flash-frozen in liquid  
552 nitrogen and stored at -80 °C until use. Sample tubes were placed on 24 well TissueLyser  
553 adapter (Qiagen 69982) and soaked in liquid nitrogen for 1 minute, 5 mm stainless steel bead  
554 was added to each sample tube and the cells were disrupted at 30 Hz for 3 times 1 minute in  
555 Mixer Mill MM400 (Retsch, Germany), with intermittent cooling between shaking. At the end  
556 of the cell disruption dry homogenised powder of cells were resuspended in 1 ml urea buffer (8  
557 M urea, 50 mM Tris/HCl pH 8.0 containing one tablet of ‘cOmplete’ protease inhibitor per 25  
558 ml, Roche, Germany; 1 mM DTT; 0.1 M PMSF) and centrifuged at  $16,000 \times g$  for 10 minutes  
559 at 4 °C. The supernatant was used for subsequent analysis. Samples were diluted ten times and  
560 protein concentrations were measured by BCA assay (ThermoFisher 23225). Samples were  
561 diluted to 1 mg/ml final concentration in Laemmli buffer and boiled at 95 °C for 10 minutes.  
562 40 µg of each sample was loaded in 1.5 mm thickness gels for SDS-PAGE, subsequently  
563 analysed by Western blotting.

564 **Yeast two-hybrid analysis**

565 Yeast two-hybrid analyses were performed as per the previous report (Pohlmann *et al.*, 2015).  
566 The two-hybrid system Matchmaker 3 from Clontech was used as per manufacturer’s  
567 instructions. Yeast strain AH109 was co-transformed with derivatives of pGBKT7-DS and  
568 pGADT7-Sfi (Appendix Tables S8) and were grown on synthetic dropout plates (SD) without  
569 leucine and tryptophan at 28 °C for 2 days. Transformants were patched on SD plates without  
570 leucine and tryptophan (control) or on SD plates without leucine, tryptophan, histidine, and  
571 adenine (selection). Plates were incubated at 28 °C for 2 days to test for growth under selection  
572 condition. For qualitative plate assays, cells (SD -leu, -trp, OD600 of 0.5) were serially diluted  
573 1:5 with sterile water, spotted 4 µl each on control and selection plates and incubated at 28 °C  
574 for 2 days. Colony growth was documented with a LAS 4000 imaging system (GE Healthcare).

## 575 **SDS-PAGE and immunoblotting**

576 All SDS-PAGE and Western blotting experiments were performed as reported previously  
577 (Jankowski *et al.*, 2019). Western blotting samples were resolved by 8 or 10 or 12 % SDS-  
578 PAGE and transferred and immobilised on nitrocellulose membrane (Amersham Protran) by  
579 semi-dry blotting using Towbin buffer (25 mM Tris pH 8.6, 192 mM Glycine, 15% Methanol).  
580 Proteins were detected using  $\alpha$ -His from mouse (Sigma H1029),  $\alpha$ -Gfp from mouse, (Roche,  
581 Germany),  $\alpha$ -tRfp from rabbit (AB233-EV, Evrogen) and  $\alpha$ -Actin from mouse (MP  
582 Biomedicals, Germany) as primary antibodies. As secondary antibodies  $\alpha$ -mouse IgG HRP  
583 conjugate (Promega W4021) or  $\alpha$ -rabbit IgG HRP conjugate (Cell Signaling #7074) were used.  
584 Antibodies bound to nitrocellulose membranes were removed by incubating in TBS buffer pH  
585 3.0 (50 Tris pH 3.0, 150mM NaCl) at room temperature, before detecting with the constitutively  
586 expressed control ( $\alpha$ -Actin). Detection was carried out by using ECL<sup>TM</sup> Prime (Cytiva  
587 RPN2236). Images were taken by luminescence image analyser, LAS4000 (GE Healthcare) as  
588 per the manufacturer's instructions.

## 589 **Multiangle light scattering (MALS)**

590 MALS was performed as per the previous report (Weiler *et al.*, 2021). Superdex 200 Increase  
591 10/300 GL column (GE Healthcare) was pre-equilibrated overnight at 0.1 ml/minute flow  
592 rate with buffer E (20 mM HEPES pH 8.0, 200 mM NaCl, 1 mM  $\beta$ -ME). For each analysis, 200  
593  $\mu$ l of a protein sample at 2.0 mg/ml concentration was loaded onto the column at 0.6 ml/minute  
594 flow rate using a 1260 binary pump (Agilent Technologies). The scattered light was measured  
595 with a miniDAWN TREOS II light scatterer, (Wyatt Technologies), and the refractive index  
596 was measured with an Optilab T-rEX refractometer, (Wyatt Technologies). Data analysis was  
597 performed with ASTRA 7.3.2.21 (Wyatt Technologies; Slotboom *et al.*, 2008).

## 598 **Crystallisation of H-Rrm4 NT4**

599 Initial crystallisation conditions were searched using MRC 3 96-well sitting drop plates and  
600 various commercially available crystallisation screens at 12 °C. 0.1  $\mu$ l homogeneous protein  
601 solution (10 mg/ml in 20 mM Hepes pH 8.0, 500 mM NaCl) was mixed with 0.1  $\mu$ l reservoir  
602 solution and equilibrated against 40  $\mu$ l of the reservoir. After one week, initial rod-shaped  
603 crystals were found, which were then further optimised by slightly varying the precipitant  
604 concentrations. Optimisation was also performed in sitting drop plates (24-well) at 12 °C but  
605 by mixing 1  $\mu$ l protein solution with 1  $\mu$ l of the reservoir solution, equilibrated against 300  $\mu$ l  
606 reservoir solution. Best diffracting crystals were grown within 7 days in 0.1 M Hepes pH 7.5,

607 20% (w/v) PEG 10000 (Qiagen PEG I, D5). Before harvesting the crystal, crystal-containing  
608 drops were overlaid with 2  $\mu$ l mineral oil and immediately flash-frozen in liquid nitrogen.

### 609 **Data collection, processing, and structure refinement**

610 A complete data set of the H-Rrm4-NT4 were collected at beamline ID23EH1 (ESRF, France)  
611 at 100 K and wavelength 0.98 Å up to 2.6 Å resolution. All data were processed using the  
612 automated pipeline at the EMBL HAMBURG and reprocessed afterwards using XDS (Kabsch,  
613 2014). Above obtained model for MLLE2 by TopModel was successfully used to phase the 2.6  
614 Å data set of Rrm4 MLLE using the program Phaser from the program suite Phenix (Afonine  
615 *et al.*, 2012). The structure was then refined in iterative cycles of manual building and  
616 refinement in coot (Emsley & Cowtan, 2004), followed by software-based refinements using  
617 the program suite Phenix (Afonine *et al.*, 2012.) All residues were in the preferred and  
618 additionally allowed regions of the Ramachandran plot (Appendix Table S2). The data  
619 collection and refinement statistics are listed in Appendix Table S2. The structure and models  
620 were compared using the superpose tool of PHENIX calculating the corresponding RMSD. The  
621 images of the models were prepared using PyMOL. The structure was deposited at the  
622 worldwide protein data bank under the accession code 7PZE.

### 623 **Small angle X-ray scattering**

624 We collected all SAXS data on beamline BM29 at the ESRF Grenoble (Pernot *et al.*, 2013;  
625 Pernot *et al.*, 2010). The beamline was equipped with a PILATUS 2M detector (Dectris) with  
626 a fixed sample to a distance of 2.827 m. To prevent concentration-dependent oligomerisation,  
627 we performed the measurements with 0.6 mg/ml protein concentrations at 10 °C in buffer E.  
628 We collected one frame each second and scaled the data to absolute intensity against water. All  
629 used programs for data processing were part of the ATSAS Software package (Version  
630 3.0.3; Manalastas-Cantos *et al.*, 2021). The primary data reduction was performed with the  
631 program Primus (Konarev *et al.*, 2003). With Primus and the included Guinier approximation  
632 (Franke & Svergun, 2009), we determined the forward scattering  $I(0)$  and the radius of gyration  
633 ( $R_g$ ). The pair-distribution function  $p(r)$  was calculated with Gnom (Svergun, 1992) and was  
634 used to estimate the maximum particle dimension ( $D_{max}$ ). Due to the high flexibility of the  
635 proteins we performed an Ensemble Optimization Method (EOM; Tria *et al.*, 2015; default  
636 parameters, 10,000 models in the initial ensemble, native-like models, constant subtraction  
637 allowed) with the predicted MLLE domains from TopModel (Mulnaes *et al.*, 2021; Mulnaes *et al.*,  
638 2020b) for H-Rrm4-NT4 and G-Rrm4 with an additional GST (PDB1ua5). We uploaded

639 the data to the Small Angle Scattering Biological Data Bank (SASBDB; Kikhney *et al.*, 2020;  
640 Valentini *et al.*, 2015) with the accession codes SASDMS5(G-Rrm4) and SASDMT5 (H-Rrm4-  
641 NT4).

#### 642 **Isothermal titration calorimetry**

643 All ITC experiments were performed as per the previous report (Abts *et al.*, 2013). All the  
644 protein samples used in ITC were centrifuged at  $451,000 \times g$  for 30 minutes and quantified by  
645 Nanodrop (A280) before use. The concentration of GST or His-tagged MLLE variants were  
646 adjusted to 30  $\mu\text{M}$  and PAM2 peptide variants were adjusted to 300  $\mu\text{M}$  using buffer G (20 mM  
647 HEPES pH 8.0, 200 mM NaCl, 1 mM 2 ME). Using an MicroCal iTC200 titration calorimeter  
648 (Malvern Panalytical technologies), a PAM2 peptide variant with a volume of 40  $\mu\text{L}$  was  
649 titrated to the different GST-MLLE variants. All experiments were repeated at least twice. ITC  
650 measurements were performed at 25 °C with 40 injections (1  $\mu\text{L}$  each). Only the first injection  
651 had a volume of 0.5  $\mu\text{L}$  and was discarded from the isotherm. The other technical parameters  
652 were reference power, 5  $\mu\text{cal s}^{-1}$ ; stirring speed, 1000 rpm; spacing time, 120 s, and a filter  
653 period, 5 s. The resulting isotherm was fitted with a one-site binding model using MicroCal  
654 Origin for ITC software (MicroCal LLC). Note, that the binding of GST-Rrm4-NT4 and H-  
655 Rrm4-NT4 were comparable indicating that tagging of the Rrm4 versions did not influence the  
656 binding affinity (Fig. 3B; Fig. EV3H).

#### 657 **Microscopy, image processing and image analysis**

658 Laser-based epifluorescence-microscopy was performed on a Zeiss Axio Observer.Z1 as  
659 previously described (Jankowski *et al.*, 2019). Co-localisation studies of dynamic processes  
660 were carried out with a two-channel imager (DV2, Photometrics, Tucson, AZ, USA; Baumann  
661 *et al.*, 2016). To quantify uni- and bipolar hyphal growth, cells were grown in 30 ml cultures to  
662 an  $\text{OD}_{600}$  of 0.5, and hyphal growth was induced. After 6 hours, more than 100 hyphae were  
663 analysed per strains towards their growth behaviour ( $n = 3$ ). Cells were assessed for unipolar  
664 and bipolar growth as well as the formation of a basal septum. To analyse the signal number,  
665 velocity, and travelled distance of fluorescently labelled proteins, movies with an exposure time  
666 of 150 ms and 150 frames were recorded. More than 25 hyphae were analysed per strain ( $n =$   
667 3). To inhibit microtubule polymerisation, hyphal cultures were incubated with 50  $\mu\text{M}$  of  
668 benomyl (Sigma Aldrich) for 2 h at 28 °C and 200 rpm (Becht *et al.*, 2006). All movies and  
669 images were processed and analysed using the Metamorph software (Version 7.7.0.0,  
670 Molecular Devices, Seattle, IL, USA). For the generation of kymographs, 20  $\mu\text{m}$  of hyphal cell



671 starting at the hyphal tip were used. To determine the minimum and maximum grey level  
672 intensities of shuttling endosomes, 100 signals were analysed per strain (the ten most prominent  
673 signals per kymograph that showed processive movement of  $> 20 \mu\text{m}$  without changes in  
674 directions were chosen per strain). The minimum and maximum grey level intensities were  
675 measured using the region measurement tool of the Metamorph software. All pixel intensities  
676 were measured, minimum and maximum intensities for each region were listed (16 bit images).  
677 The grey level intensities were normalised to the wild-type intensity, which was set to 100%.  
678 For statistical analysis of the signal number, velocity, and travelled distance, processive signals  
679 with a travelled distance of more than  $5 \mu\text{m}$  were conducted and counted manually. For  
680 determination of aberrant microtubule staining, hyphae were counted manually as well. Data  
681 points represent means from three independent experiments ( $n = 3$ ) with mean of means (red  
682 line) and SEM. For all statistical evaluations, two-tailed Student's *t*-tests were used.  
683 Determination of strains exhibiting aberrant staining of microtubules were scored manually.  
684 For verification, key comparisons were evaluated independently by two experimentalists.  
685 Importantly, the key findings were confirmed (Fig. EV5H). We used the data obtained by the  
686 more experienced microscopist in the main figure (Fig. 5D).

687

## 688 **Acknowledgements**

689 We thank Drs. Florian Altegoer and Dierk Niessing as well as laboratory members for critical  
690 reading of the manuscript. We acknowledge Drs. Georg Groth, Alexander Minges, and  
691 Mohanraj Gopalswamy for support with ITC experiments. We gratefully acknowledge the  
692 computational support provided by the “Center for Information and Media Technology” (ZIM)  
693 at the Heinrich Heine University Düsseldorf and the computing time provided by the John von  
694 Neumann Institute for Computing (NIC) on the supercomputer JUWELS at Jülich  
695 Supercomputing Centre (JSC) (user IDs: HKF7, VSK33). The synchrotron MX data were  
696 collected at ESRF ID23-EH1. We thank Sylvain Engilberge for the assistance in using the  
697 beamline. The final SAXS experiments were performed on beamline BM29 at the European  
698 Synchrotron Radiation Facility (ESRF), Grenoble, France. We are grateful to Dihia Moussaoui  
699 at the ESRF for providing assistance during data collection. The work was funded by grants  
700 from the Deutsche Forschungsgemeinschaft under Germany's Excellence Strategy EXC-  
701 2048/1 - Project ID 39068111 to MF; Project-ID 267205415 – SFB 1208 to MF (project A09),  
702 HG (project A03), and LS (project A01). The Center for Structural Studies is funded by the  
703 Deutsche Forschungsgemeinschaft (DFG Grant number 417919780; INST 208/740-1  
704 FUGG; INST 208/761-1 FUGG).

705

706 **Author contributions**

707 SKD, SSV, LS, SHJS, HG, and MF designed this study and analysed the data. SKD and SSV  
708 contributed equally to the structural biology of the MLL1 binding platform; SKD performed  
709 the wet-lab experiments and SSV was responsible for modelling. KM and SKD performed the  
710 cell biological experiments. KM and LB coordinated strain generation and experimental design.  
711 JR, EH, AH contributed to SAXS, MALS, and X-ray analysis, respectively. SKD, SSV, LS,  
712 SHJS, HG, and MF drafted and revised the manuscript with input from all co-authors. SKD,  
713 SSV, SHJS, HG and MF directed the project.

714

715 **Conflict of interest**

716 The authors declare that they have no competing interests.

717

718 **References**

- 719 Abts A, Montalban-Lopez M, Kuipers OP, Smits SH, Schmitt L (2013) NisC binds the FxLx  
720 motif of the nisin leader peptide. *Biochemistry* 52: 5387-5395
- 721 Afonine PV, Grosse-Kunstleve RW, Echols N, Headd JJ, Moriarty NW, Mustyakimov M,  
722 Terwilliger TC, Urzhumtsev A, Zwart PH, Adams PD (2012) Towards automated  
723 crystallographic structure refinement with phenix.refine. *Acta Crystallogr D Biol*  
724 *Crystallogr* 68: 352-367
- 725 Albrecht M, Lengauer T (2004) Survey on the PABC recognition motif PAM2. *Biochem*  
726 *Biophys Res Commun* 316: 129-138
- 727 Baek M, DiMaio F, Anishchenko I, Dauparas J, Ovchinnikov S, Lee GR, Wang J, Cong Q,  
728 Kinch LN, Schaeffer RD *et al.* (2021) Accurate prediction of protein structures and  
729 interactions using a three-track neural network. *Science* 373: 871-876
- 730 Baumann S, König J, Koepke J, Feldbrügge M (2014) Endosomal transport of septin mRNA  
731 and protein indicates local translation on endosomes and is required for correct septin  
732 filamentation. *EMBO Rep* 15: 94-102
- 733 Baumann S, Pohlmann T, Jungbluth M, Brachmann A, Feldbrügge M (2012) Kinesin-3 and  
734 dynein mediate microtubule-dependent co-transport of mRNPs and endosomes. *J Cell Sci*  
735 125: 2740-2752

- 736 Baumann S, Zander S, Weidtkamp-Peters S, Feldbrügge M (2016) Live cell imaging of septin  
737 dynamics in *Ustilago maydis*. In: *Methods in Cell Biol: Septins*, Gladfelter A.S. (ed.) pp.  
738 143-159. Elsevier Inc.:
- 739 Becht P, König J, Feldbrügge M (2006) The RNA-binding protein Rrm4 is essential for polarity  
740 in *Ustilago maydis* and shuttles along microtubules. *J Cell Sci* 119: 4964-4973
- 741 Béthune J, Jansen RP, Feldbrügge M, Zarnack K (2019) Membrane-associated RNA-binding  
742 proteins orchestrate organelle-coupled translation *Trends in cell biology* 29: 178-188
- 743 Brachmann A, König J, Julius C, Feldbrügge M (2004) A reverse genetic approach for  
744 generating gene replacement mutants in *Ustilago maydis*. *Mol Gen Genom* 272: 216-226
- 745 Brachmann A, Weinzierl G, Kämper J, Kahmann R (2001) Identification of genes in the bW/bE  
746 regulatory cascade in *Ustilago maydis*. *Mol Microbiol* 42: 1047-1063
- 747 Cioni JM, Lin JQ, Holtermann AV, Koppers M, Jakobs MAH, Azizi A, Turner-Bridger B,  
748 Shigeoka T, Franze K, Harris WA *et al.* (2019) Late endosomes act as mRNA translation  
749 platforms and sustain mitochondria in axons. *Cell* 176: 56-72 e15
- 750 Das S, Vera M, Gandin V, Singer RH, Tutucci E (2021) Intracellular mRNA transport and  
751 localized translation. *Nat Rev Mol Cell Biol* 22: 483-504
- 752 Deo RC, Sonenberg N, Burley SK (2001) X-ray structure of the human hyperplastic discs  
753 protein: an ortholog of the C-terminal domain of poly(A)-binding protein. *Proc Natl Acad*  
754 *Sci U S A* 98: 4414-4419
- 755 Emsley P, Cowtan K (2004) Coot: model-building tools for molecular graphics. *Acta*  
756 *Crystallogr D Biol Crystallogr* 60: 2126-2132
- 757 Fernandopulle MS, Lippincott-Schwartz J, Ward ME (2021) RNA transport and local  
758 translation in neurodevelopmental and neurodegenerative disease. *Nature neuroscience*
- 759 Franke D, Petoukhov MV, Konarev PV, Panjkovich A, Tuukkanen A, Mertens HDT, Kikhney  
760 AG, Hajizadeh NR, Franklin JM, Jeffries CM *et al.* (2017) ATSAS 2.8: a comprehensive  
761 data analysis suite for small-angle scattering from macromolecular solutions. *J Appl*  
762 *Crystallogr* 50: 1212-1225
- 763 Franke D, Svergun DI (2009) DAMMIF, a program for rapid ab-initio shape determination in  
764 small-angle scattering. *J Appl Crystallogr* 42: 342-346
- 765 Grimm C, Pelz JP, Schneider C, Schaffler K, Fischer U (2020) Crystal structure of a variant  
766 PAM2 motif of LARP4B bound to the MLLLE domain of PABPC1. *Biomol* 10
- 767 Haag C, Steuten B, Feldbrügge M (2015) Membrane-coupled mRNA trafficking in fungi. *Annu*  
768 *Rev Microbiol* 69: 265-281

- 769 Jankowski S, Pohlmann T, Baumann S, Müntjes KM, Devan SK, Zander S, Feldbrügge M  
770 (2019) The multi PAM2 protein Upa2 functions as novel core component of endosomal  
771 mRNA transport. *EMBO Rep* 24: e47381
- 772 Jinek M, Fabian MR, Coyle SM, Sonenberg N, Doudna JA (2010) Structural insights into the  
773 human GW182-PABC interaction in microRNA-mediated deadenylation. *Nat Struct Mol*  
774 *Biol* 17: 238-240
- 775 Jumper J, Evans R, Pritzel A, Green T, Figurnov M, Ronneberger O, Tunyasuvunakool K, Bates  
776 R, Zidek A, Potapenko A *et al.* (2021) Highly accurate protein structure prediction with  
777 AlphaFold. *Nature* 596: 583-589
- 778 Kabsch W (2014) Processing of X-ray snapshots from crystals in random orientations. *Acta*  
779 *Crystallogr D Biol Crystallogr* 70: 2204-2216
- 780 Kikhney AG, Borges CR, Molodenskiy DS, Jeffries CM, Svergun DI (2020) SASBDB:  
781 Towards an automatically curated and validated repository for biological scattering data.  
782 *Protein Sci* 29: 66-75
- 783 Konarev PV, Volkov VV, Sokolova AV, Koch MHJ, Svergun DI (2003) PRIMUS: a Windows  
784 PC-based system for small-angle scattering data analysis. *J Appl Crystallogr* 36: 1277-  
785 1282
- 786 Kozlov G, De Crescenzo G, Lim NS, Siddiqui N, Fantus D, Kahvejian A, Trempe JF, Elias D,  
787 Ekiel I, Sonenberg N *et al.* (2004) Structural basis of ligand recognition by PABC, a highly  
788 specific peptide-binding domain found in poly(A)-binding protein and a HECT ubiquitin  
789 ligase. *EMBO J* 23: 272-281
- 790 Kozlov G, Gehring K (2010) Molecular basis of eRF3 recognition by the MLLE domain of  
791 poly(A)-binding protein. *PLoS One* 5: e10169
- 792 Kozlov G, Menade M, Rosenauer A, Nguyen L, Gehring K (2010) Molecular determinants of  
793 PAM2 recognition by the MLLE domain of poly(A)-binding protein. *J Mol Biol* 397: 397-  
794 407
- 795 Kozlov G, Trempe JF, Khaleghpour K, Kahvejian A, Ekiel I, Gehring K (2001) Structure and  
796 function of the C-terminal PABC domain of human poly(A)-binding protein. *Proc Natl*  
797 *Acad Sci U S A* 98: 4409-4413
- 798 Liao YC, Fernandopulle MS, Wang G, Choi H, Hao L, Drerup CM, Patel R, Qamar S, Nixon-  
799 Abell J, Shen Y *et al.* (2019) RNA granules hitchhike on lysosomes for long-distance  
800 transport, using annexin A11 as a molecular tether. *Cell* 179: 147-164 e120
- 801 Lim NS, Kozlov G, Chang TC, Groover O, Siddiqui N, Volpon L, De Crescenzo G, Shyu AB,  
802 Gehring K (2006) Comparative peptide binding studies of the PABC domains from the

- 803 ubiquitin-protein isopeptide ligase HYD and poly(A)-binding protein. Implications for  
804 HYD function. *The Journal of biological chemistry* 281: 14376-14382
- 805 Loubradou G, Brachmann A, Feldbrügge M, Kahmann R (2001) A homologue of the  
806 transcriptional repressor Ssn6p antagonizes cAMP signalling in *Ustilago maydis*. *Mol*  
807 *Microbiol* 40: 719-730
- 808 Manalastas-Cantos K, Konarev PV, Hajizadeh NR, Kikhney AG, Petoukhov MV, Molodenskiy  
809 DS, Panjkovich A, Mertens HDT, Gruzinov A, Borges C *et al.* (2021) ATSAS 3.0:  
810 expanded functionality and new tools for small-angle scattering data analysis. *J Appl*  
811 *Crystallogr* 54
- 812 Mangus DA, Amrani N, Jacobson A (1998) Pbp1p, a factor interacting with *Saccharomyces*  
813 *cerevisiae* poly(A)-binding protein, regulates polyadenylation. *Molecular and cellular*  
814 *biology* 18: 7383-7396
- 815 Mangus DA, Evans MC, Jacobson A (2003) Poly(A)-binding proteins: multifunctional  
816 scaffolds for the post-transcriptional control of gene expression. *Genome Biol* 4: 223
- 817 Mattijssen S, Kozlov G, Fonseca BD, Gehring K, Maraia RJ (2021) LARP1 and LARP4: up  
818 close with PABP for mRNA 3' poly(A) protection and stabilization. *RNA Biol* 18: 259-274
- 819 Mofatteh M, Bullock SL (2017) SnapShot: Subcellular mRNA localization. *Cell* 169: 178.e171
- 820 Müller J, Pohlmann T, Feldbrügge M (2019) Core components of endosomal mRNA transport  
821 are evolutionarily conserved in fungi. *Fungal Genet Biol* 126: 12-16
- 822 Mulnaes D, Gohlke H (2018) TopScore: using deep neural networks and large diverse data sets  
823 for accurate protein model quality assessment. *J Chem Theory Comput* 14: 6117-6126
- 824 Mulnaes D, Koenig F, Gohlke H (2021) TopSuite Web Server: A Meta-Suite for Deep-  
825 Learning-Based Protein Structure and Quality Prediction. *Journal of chemical information*  
826 *and modeling* 61: 548-553
- 827 Mulnaes D, Porta N, Clemens R, Apanasenko I, Reiners J, Gremer L, Neudecker P, Smits SHJ,  
828 Gohlke H (2020a) TopModel: template-based protein structure prediction at low sequence  
829 identity using top-down consensus and deep neural networks. *J Chem Theory Comput* 16:  
830 1953-1967
- 831 Mulnaes D, Porta N, Clemens R, Apanasenko I, Reiners J, Gremer L, Neudecker P, Smits SHJ,  
832 Gohlke H (2020b) TopModel: Template-Based Protein Structure Prediction at Low  
833 Sequence Identity Using Top-Down Consensus and Deep Neural Networks. *J Chem*  
834 *Theory Comput* 16: 1953-1967

- 835 Munoz-Escobar J, Matta-Camacho E, Kozlov G, Gehring K (2015) The MLLE domain of the  
836 ubiquitin ligase UBR5 binds to its catalytic domain to regulate substrate binding. *The*  
837 *Journal of biological chemistry* 290: 22841-22850
- 838 Müntjes K, Devan SK, Reichert AS, Feldbrügge M (2021) Linking transport and translation of  
839 mRNAs with endosomes and mitochondria. *EMBO reports* accepted for publication
- 840 Müntjes K, Philipp M, Husemann L, Heucken N, Weidtkamp-Peters S, Schipper K, Zurbriggen  
841 MD, Feldbrügge M (2020) Establishing polycistronic expression in the model  
842 microorganism *Ustilago maydis*. *Front Microbiol* 11: 1384
- 843 Niessing D, Jansen RP, Pohlmann T, Feldbrügge M (2018) mRNA transport in fungal top  
844 models. *Wiley interdisciplinary reviews RNA* 9: e1453
- 845 Olgeiser L, Haag C, Boerner S, Ule J, Busch A, Koepke J, König J, Feldbrügge M, Zarnack K  
846 (2019) The key protein of endosomal mRNP transport Rrm4 binds translational landmark  
847 sites of cargo mRNAs. *EMBO Rep* 20: e46588
- 848 Pernot P, Round A, Barrett R, De Maria Antolinos A, Gobbo A, Gordon E, Huet J, Kieffer J,  
849 Lentini M, Mattenet M *et al.* (2013) Upgraded ESRF BM29 beamline for SAXS on  
850 macromolecules in solution. *Journal of synchrotron radiation* 20: 660-664
- 851 Pernot P, Theveneau P, Giraud T, Fernandes RN, Nurizzo D, Spruce D, Surr J, McSweeney S,  
852 Round A, Felisaz F *et al.* (2010) New beamline dedicated to solution scattering from  
853 biological macromolecules at the ESRF. *Journal of Physics: Conference Series* 247:  
854 012009
- 855 Pohlmann T, Baumann S, Haag C, Albrecht M, Feldbrügge M (2015) A FYVE zinc finger  
856 domain protein specifically links mRNA transport to endosome trafficking. *eLife* 4: e06041
- 857 Quentin D, Schuhmacher JS, Klink BU, Lauer J, Shaikh TR, Huis in t't Veld PJ, Welp LM,  
858 Urlaub H, Zerial M, Raunser S (2021) Structure of the human FERRY Rab5 effector  
859 complex. *bioRxiv* 10.1101/2021.06.21.449265
- 860 Sawazaki R, Imai S, Yokogawa M, Hosoda N, Hoshino SI, Mio M, Mio K, Shimada I, Osawa  
861 M (2018) Characterization of the multimeric structure of poly(A)-binding protein on a  
862 poly(A) tail. *Sci Rep* 8: 1455
- 863 Schäfer IB, Yamashita M, Schuller JM, Schussler S, Reichelt P, Strauss M, Conti E (2019)  
864 Molecular basis for poly(A) RNP architecture and recognition by the Pan2-Pan3  
865 deadenylase. *Cell* 177: 1619-1631 e1621
- 866 Schuhmacher JS, Dieck ST, Christoforidis S, Landerer C, Hersemann L, Seifert S, Giner A,  
867 Toth-Petroczy A, Kalaidzidis Y, Schumann EM *et al.* (2021) The novel Rab5 effector

- 868 FERRY links early endosomes with the translation machinery. *BioRiv*  
869 10.1101/2021.06.20.449167
- 870 Slotboom DJ, Duurkens RH, Olieman K, Erkens GB (2008) Static light scattering to  
871 characterize membrane proteins in detergent solution. *Methods* 46: 73-82
- 872 Stenmark H, Aasland R, Driscoll PC (2002) The phosphatidylinositol 3-phosphate-binding  
873 FYVE finger. *FEBS Lett* 513: 77-84
- 874 Studier FW (2005) Protein production by auto-induction in high density shaking cultures.  
875 *Protein Expr Purif* 41: 207-234
- 876 Su H, Meng S, Lu Y, Trombly MI, Chen J, Lin C, Turk A, Wang X (2011) Mammalian  
877 hyperplastic discs homolog EDD regulates miRNA-mediated gene silencing. *Mol Cell* 43:  
878 97-109
- 879 Svergun DI (1992) Determination of the regularization parameter in indirect-transform methods  
880 using perceptual criteria. *J Appl Crystallogr* 25: 495-503
- 881 Terfrüchte M, Joehnk B, Fajardo-Somera R, Braus G, Riquelme M, Schipper K, Feldbrügge M  
882 (2014) Establishing a versatile Golden Gate cloning system for genetic engineering in  
883 fungi. *Fungal Genet Biol* 62: 1-10
- 884 Tian L, Chou HL, Fukuda M, Kumamaru T, Okita TW (2020a) mRNA localization in plant  
885 cells. *Plant Physiol* 182: 97-109
- 886 Tian L, Chou HL, Zhang L, Hwang SK, Starckenburg SR, Doroshenk KA, Kumamaru T, Okita  
887 TW (2018) RNA-binding protein RBP-P is required for glutelin and prolamine mRNA  
888 localization in rice endosperm cells. *Plant Cell* 30: 2529-2552
- 889 Tian L, Doroshenk KA, Zhang L, Fukuda M, Washida H, Kumamaru T, Okita T (2020b)  
890 Zipcode RNA-binding proteins and membrane trafficking proteins cooperate to transport  
891 glutelin mRNAs in rice endosperm. *Plant Cell* 32: 2566-2581
- 892 Tria G, Mertens HD, Kachala M, Svergun DI (2015) Advanced ensemble modelling of flexible  
893 macromolecules using X-ray solution scattering. *IUCrJ* 2: 207-217
- 894 Valentini E, Kikhney AG, Previtali G, Jeffries CM, Svergun DI (2015) SASBDB, a repository  
895 for biological small-angle scattering data. *Nucleic Acids Res* 43: D357-363
- 896 Weiler AJ, Spitz O, Gudzuhn M, Schott-Verdugo SN, Kamel M, Thiele B, Streit RW, Kedrov  
897 A, L. S, Gohlke H *et al.* (2021) Novel intracellular phospholipase B from *Pseudomonas*  
898 *aeruginosa* with activity towards endogenous phospholipids affects biofilm assembly.  
899 *bioRiv* doi.org/10.1101/2021.06.15.448513
- 900 Xie J, Kozlov G, Gehring K (2014) The "tale" of poly(A) binding protein: the MLLE domain  
901 and PAM2-containing proteins. *Biochim Biophys Acta* 1839: 1062-1068

Devan, Schott-Verdugo *et al.*

- 902 Yang R, Gaidamakov SA, Xie J, Lee J, Martino L, Kozlov G, Crawford AK, Russo AN, Conte  
903 MR, Gehring K *et al.* (2011) La-related protein 4 binds poly(A), interacts with the poly(A)-  
904 binding protein MLE domain via a variant PAM2w motif, and can promote mRNA  
905 stability. *Mol Cell Biol* 31: 542-556
- 906 Zander S, Baumann S, Weidtkamp-Peters S, Feldbrügge M (2016) Endosomal assembly and  
907 transport of heteromeric septin complexes promote septin cytoskeleton formation. *J Cell*  
908 *Sci* 129: 2778-2792



909 **Figures**

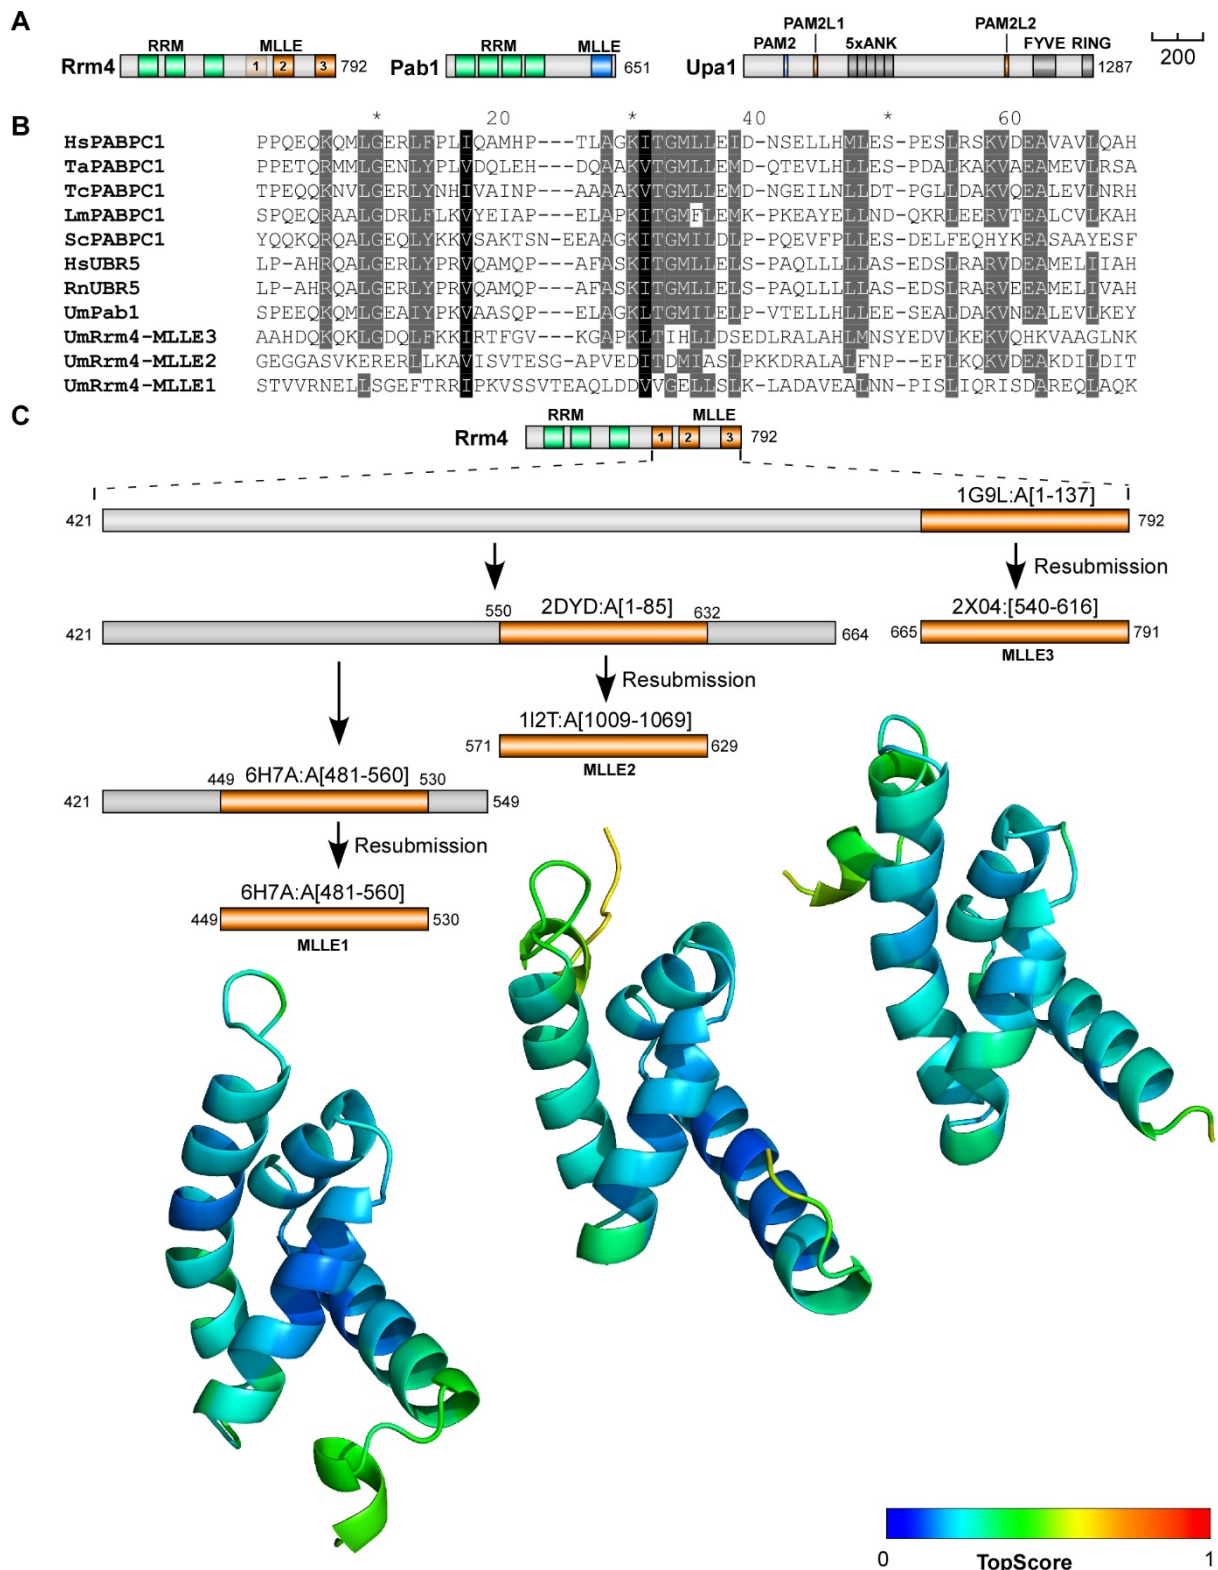

910

911 **Figure 1. The C-terminal half of Rrm4 contains three MLLE domains.**

912 (A) Schematic representation of protein variants drawn to scale (bar, 200 amino acids, number  
913 of amino acids indicated next to protein bars) using the following colouring: dark green, RNA

914 recognition motif (RRM); orange, MLLE<sup>Rrm4</sup> domains; dark blue, MLLE<sup>Pab1</sup>; light blue PAM2;  
915 light orange PAM2L sequence (PL1 – 2) Ankyrin repeats (5xANK), FYVE domain, and RING  
916 domain of Upa1 are given in dark grey. **(B)** Sequence alignment of previously determined  
917 MLLE domains showing the degree of similarity to the three Rrm4-MLLE domains and the  
918 positions (Hs - *Homo sapiens*, Ta - *Triticum aestivum*, La - *Leishmania major*, Sc -  
919 *Saccharomyces cerevisiae*, Tc - *Trypanosoma cruzi*, Rn - *Rattus norvegicus*, Um - *Ustilago*  
920 *maydis*, PABPC1, Pab1 – poly [A]-binding protein, UBR5 - E3 ubiquitin-protein ligase).  
921 Accession number and sequence coverage are listed in the Appendix Table S1. Multiple  
922 sequence alignment was performed by ClustalW. **(C)** Identification and modelling of C-  
923 terminal MLLE domains of Rrm4. The iterative process is depicted graphically. The best-  
924 identified template for each run, and the region of that template that aligns with Rrm4, are  
925 displayed (see also Fig. EV1A for the templates used for the final models). The structural  
926 models obtained are shown for the span of the first identified template and are coloured  
927 according to their per-residue TopScore, where the scale from 0 to 1 indicates a low to high  
928 local structural error.  
929

Devan, Schott-Verdugo *et al.*

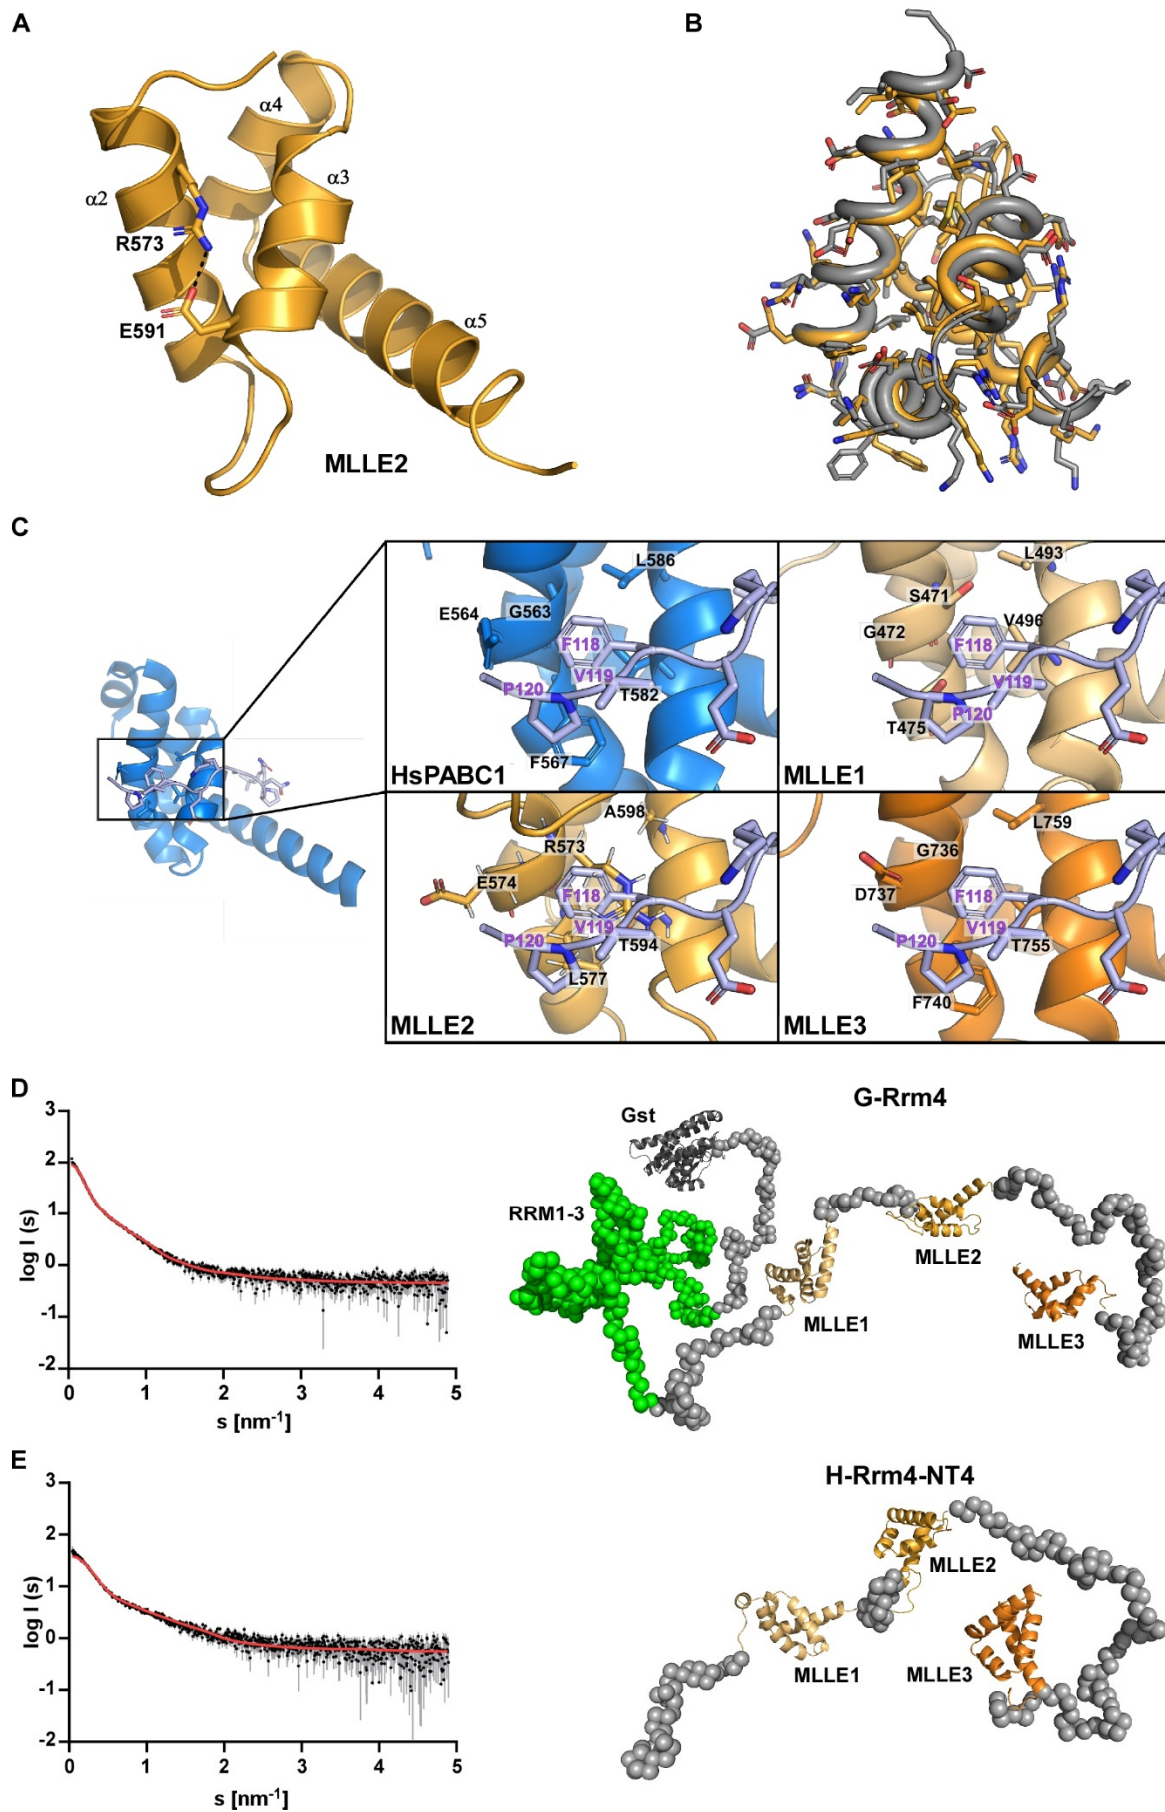

930

931 **Figure 2. Rrm4 contains a C-terminal tripartite MLLE binding platform**

932 (A) Crystal structure of the MLLE2 domain is highlighted in orange. The four helices are  
933 indicated by  $\alpha$ 2-5 according to the 5 helix nomenclature found in MLLE domains (Xie *et al.*,  
934 2014). Note that the first short helix  $\alpha$ 1 is missing. Arg573 and Glu591 are highlighted in the  
935 sticks. These side chains would interfere with the binding of the canonical Phe of PAM2 type  
936 motifs. (B) Structural alignment of the MLLE2 model generated by TopModel and the X-ray  
937 crystal structure of this domain (grey or orange, respectively). The all-atom RMSD is 0.69 Å,  
938 resulting mostly from different rotamers of solvent-exposed sidechains. (C) Comparison of  
939 peptide-binding sites after structural alignment of the models of Rrm4 MLLE domains (orange  
940 shades) and the canonical MLLE domain of HsPABPC1 (blue; PDB ID 3KUS) and manually  
941 placing the PAM2 motif of PAIP2 (lilac). In the interaction of MLLE<sup>PABPC1</sup> with PAM2 of  
942 PAIP2, Phe118 of PAM2 is the major determinant for binding and present in all the PAM2  
943 motifs except LARP4a and b (Kozlov & Gehring, 2010; Xie *et al.*, 2014; Fig. EV3A). Of the  
944 identified Rrm4 MLLE domains, only MLLE3 retains all sidechains that favour the binding of  
945 this characteristic Phe; particularly, Gly736 should allow the Phe to bind into a pocket. MLLE1  
946 and MLLE2 have Ser471 and Arg573 instead of G in this position, suggesting that Phe binding  
947 would be sterically hindered in these interfaces. (D) *Left panel* Experimental data curve for  
948 GST-Rrm4 is shown in black dots with grey error bars, the EOM fit as a red line ( $\chi^2 = 1.289$ ).  
949 The intensity is displayed as a function of momentum transfers. *Right panel* Selected model of  
950 the EOM analysis from GST-Rrm4 with a  $R_g$  of 8.75 nm, a  $D_{max}$  of 23.99 nm with a volume  
951 fraction of ~0.25. (E) *left panel* Experimental data curve for H-Rrm4NT4 is shown in black dots  
952 with grey error bars, the EOM fit as the red line ( $\chi^2 = 1.262$ ). The intensity is displayed as a  
953 function of momentum transfers. *right panel* Selected model of the EOM analysis from H-  
954 Rrm4NT4 with a  $R_g$  of 5.10 nm, a  $D_{max}$  of 16.43 nm, and a volume fraction of ~0.75. The MLLE  
955 subdomains are shown in cartoon representation (MLLE1 in light orange, MLLE2 in orange,  
956 MLLE 3 in dark orange, and the GST in dark grey) and the missing amino acids as grey spheres  
957 (all other models and the SAXS data are available in Fig. EV2E).  
958  
959

Devan, Schott-Verdugo *et al.*

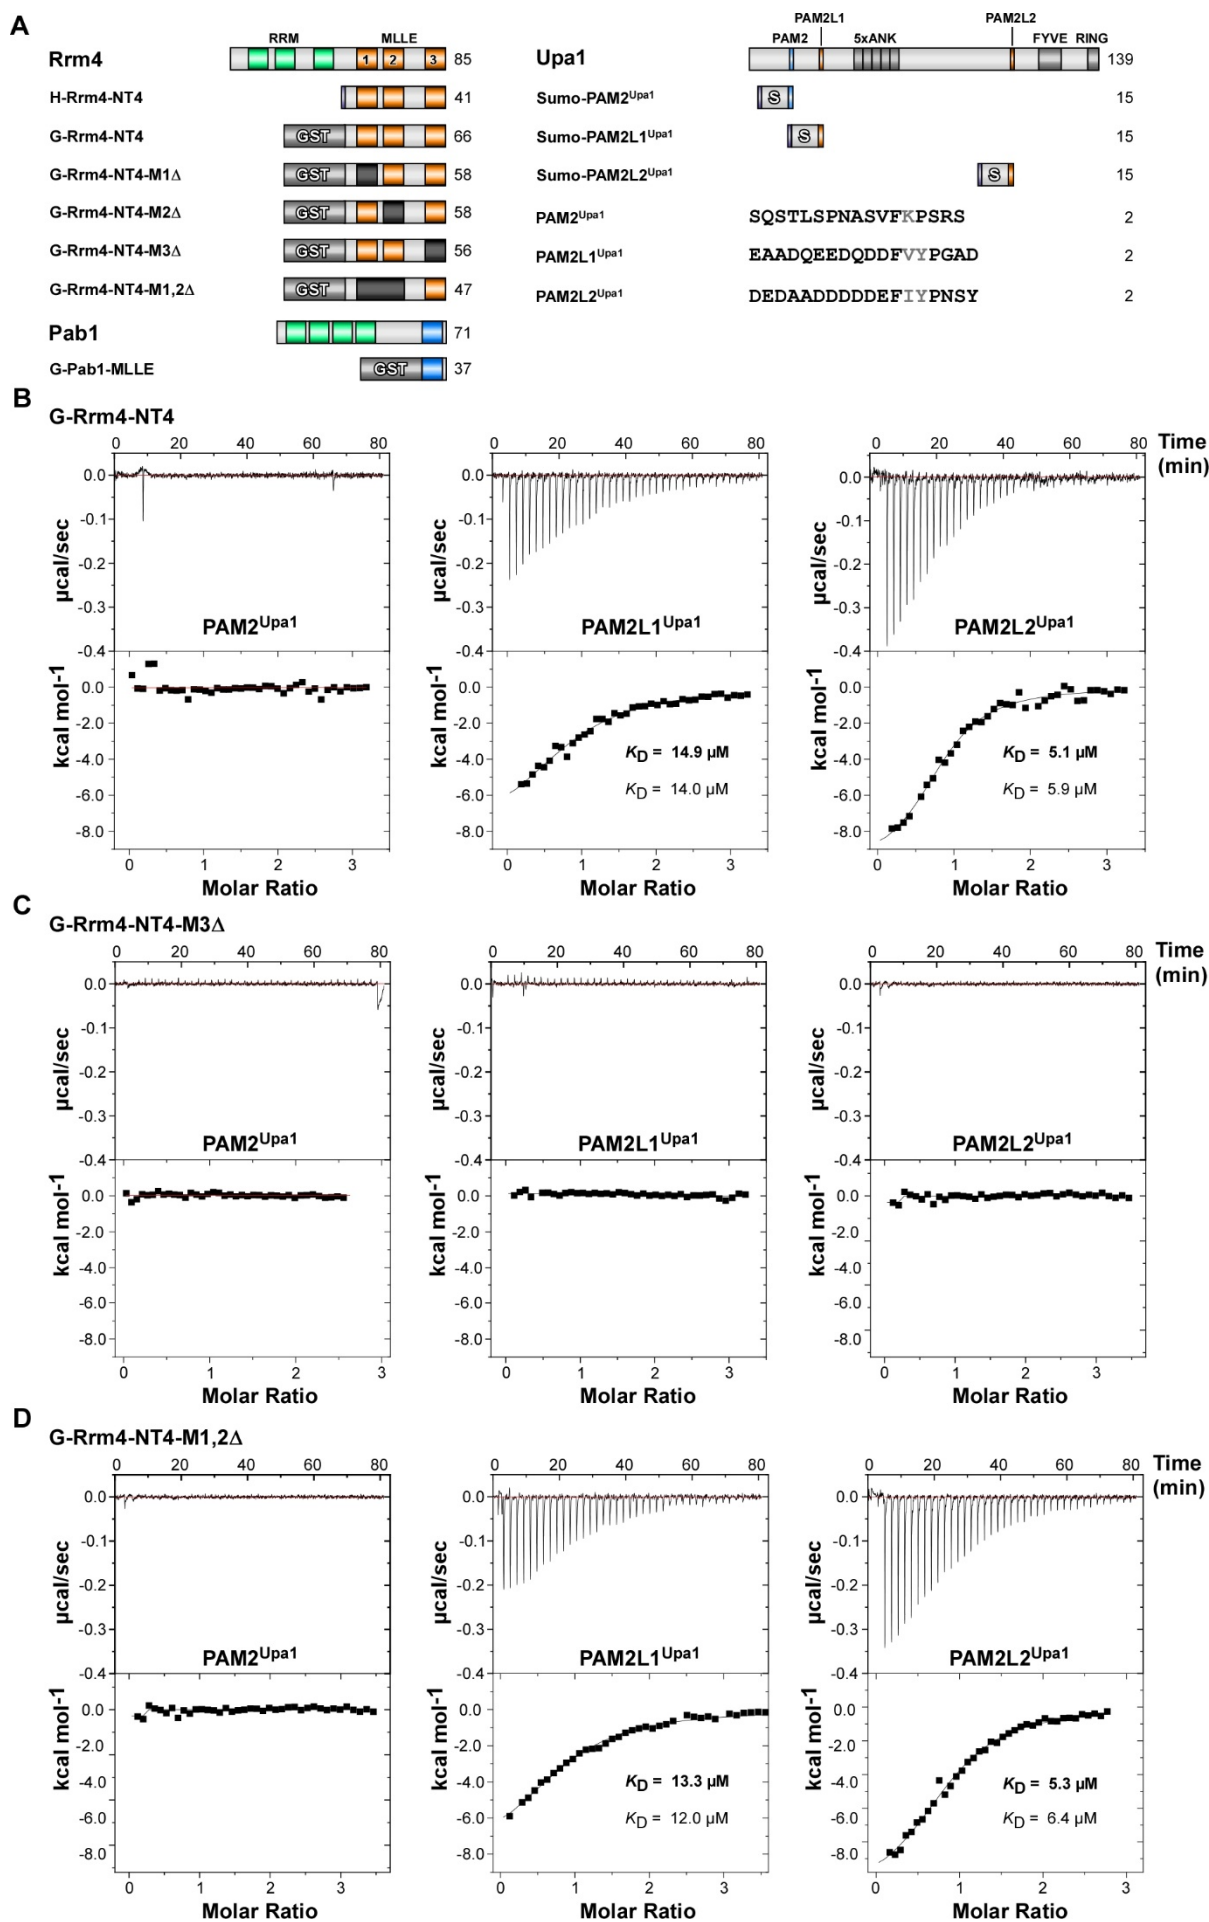

961 **Figure 3. MLLE3<sup>Rrm4</sup> is crucial for PAM2L1<sup>Upa1</sup> and PAM2L2<sup>Upa1</sup> binding.**

962 (A) Schematic representation of protein variants (Molecular weight in kilo Dalton indicated)  
963 using the following colouring: dark green, RNA recognition motif (RRM); orange, MLLE<sup>Rrm4</sup>  
964 domains; dark blue, MLLE<sup>Pab1</sup>; light blue PAM2; light orange PAM2L sequence (PL1 – 2).  
965 Ankyrin repeats (5xANK), FYVE domain, and RING domain of Upa1 are given in dark grey.  
966 GST and SUMO tags are labelled. Variant amino acids of the FxP and FxxP of PAM2 and  
967 PAM2L sequences are printed in grey font. (B-D) Representative isothermal titration  
968 calorimetry (ITC) binding curves of MLLE domains. Experiments were performed using GST-  
969 or Histidine-tagged MLLE variants and synthetic PAM2 peptide variants.  $K_D$  values of two  
970 independent measurements are given (values corresponding to the indicated data are given in  
971 bold).

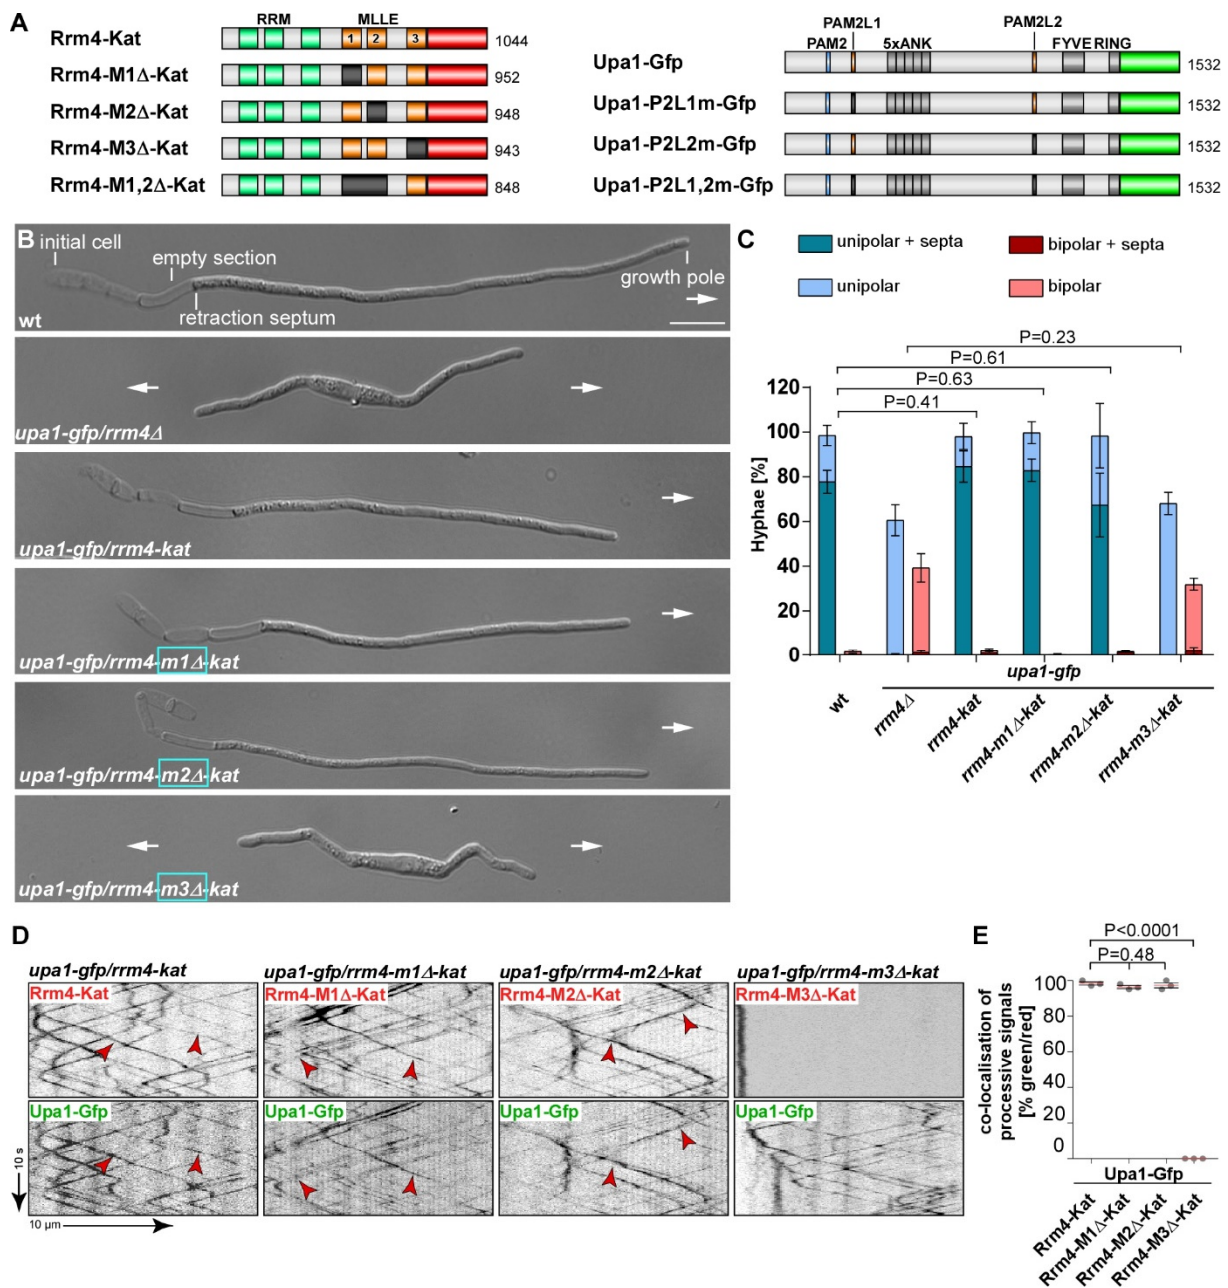

972

973 **Figure 4. MLE3 is key for endosomal mRNA transport.**

974 (A) Schematic representation of Rrm4 and Upa1 variants drawn not to scale (number of amino  
 975 acids indicated next to protein bars) using the following colouring: dark green, RNA recognition  
 976 motif (RRM); orange, MLE domains; red, mKate2, blue, PAM2, light orange PAM2 like  
 977 sequence (PL1 – 2) and light green, Gfp. Ankyrin repeats (5xANK), FYVE domain and RING  
 978 domain of Upa1 are given in dark grey. (B) Growth of AB33 derivatives in their hyphal form  
 979 (6 h.p.i.; size bar 10 μm). Growth direction is marked by arrows. (C) Quantification of hyphal  
 980 growth of AB33 derivatives shown in B (6 h.p.i.): unipolarity, bipolarity and basal septum  
 981 formation were quantified (error bars, SEM.; n = 3 independent experiments, > 100 hyphae  
 982 were counted per strain; for statistical evaluation, the percentage of uni- and bipolarity was  
 983 investigated by using unpaired two-tailed Student's t-test ( $\alpha < 0.05$ ). (D) Kymographs of AB33  
 984 hyphae derivatives (6 h.p.i.; inverted fluorescence images) expressing pairs of red and green

Devan, Schott-Verdugo *et al.*

985 fluorescent proteins as indicated. Fluorescence signals were detected simultaneously using  
986 dual-view technology (arrow length on the left and bottom indicates time and distance,  
987 respectively). Processive co-localising signals are marked by red arrowheads. (E) Percentage  
988 of processive signals exhibiting co-localisation for strains shown in D (data points represent  
989 means from  $n = 3$  independent experiments, with mean of means, red line and SEM; unpaired  
990 two-tailed Student's t-test ( $\alpha < 0.05$ ); for each experiment, 10 hyphae per strains were analysed).  
991



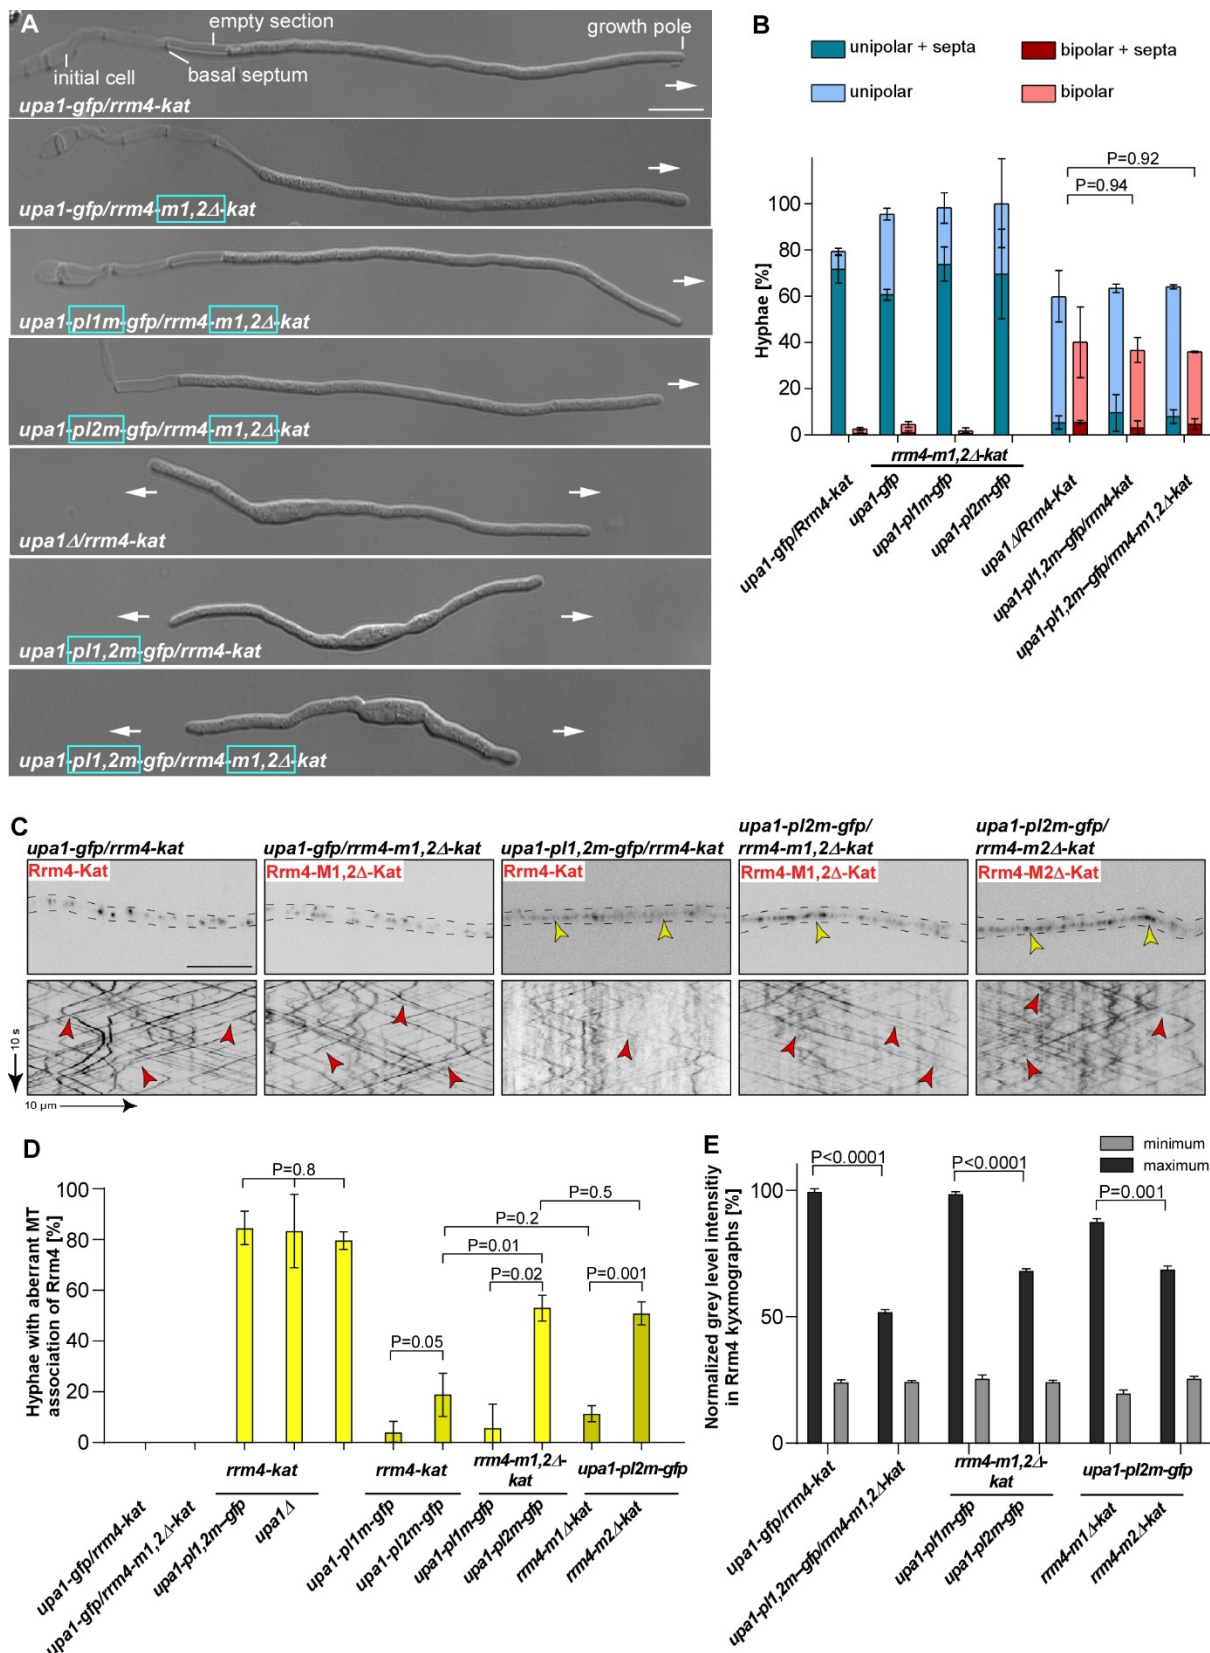

992

993 **Figure 5. MLLE2 plays an accessory role in endosomal attachment of Rrm4**

994 (A) Growth of AB33 derivatives in their hyphal form (6 h.p.i.; size bar 10  $\mu$ m). Growth  
 995 direction is marked by arrows. (B). Quantification of hyphal growth of AB33 derivatives shown  
 996 in A (6 h.p.i.): unipolarity, bipolarity and basal septum formation were quantified (error bars,

997 SEM; n = 3 independent experiments, > 100 hyphae were analysed per strain; For statistical  
998 analysis, the percentage of uni- and bipolarity was investigated by using unpaired two-tailed  
999 Student's t-test ( $\alpha < 0.05$ ). (C) Micrographs (inverted fluorescence image; size bar, 10  $\mu\text{m}$ ) and  
1000 corresponding kymographs of AB33 hyphae derivatives (6 h.p.i.) co-expressing various Upa1-  
1001 Gfp and Rrm4-Kat versions as indicated. Movement of Rrm4-Kat versions is shown (arrow  
1002 length on the left and bottom indicates time and distance, respectively). Bidirectional movement  
1003 is visible as diagonal lines (red arrowheads). Aberrant microtubule staining is indicated by a  
1004 yellow arrowhead. (D) Percentage of hyphae (6 h.p.i.) exhibiting aberrant microtubule  
1005 association as indicated in panel C and EV5C. Set of strains that were analysed simultaneously  
1006 are shown in the same yellow shading (error bars, SEM; for statistical evaluation, the percentage  
1007 of hyphae with abnormal microtubule staining was compared by using unpaired two-tailed  
1008 Student's t-test ( $\alpha < 0.05$ ); n = 3 independent experiments, > 25 hyphae were analysed per  
1009 strain). (E) Normalised minimum and maximum grey level intensities of shuttling signals  
1010 measured in Rrm4 kymographs showed in Fig. 5C and Fig. EV5C (error bars, SEM; n = 3  
1011 independent experiments, 100 shuttling signals kymographs were analysed per strain, two-  
1012 tailed Student's t-test ( $\alpha > 0.05$ ).  
1013

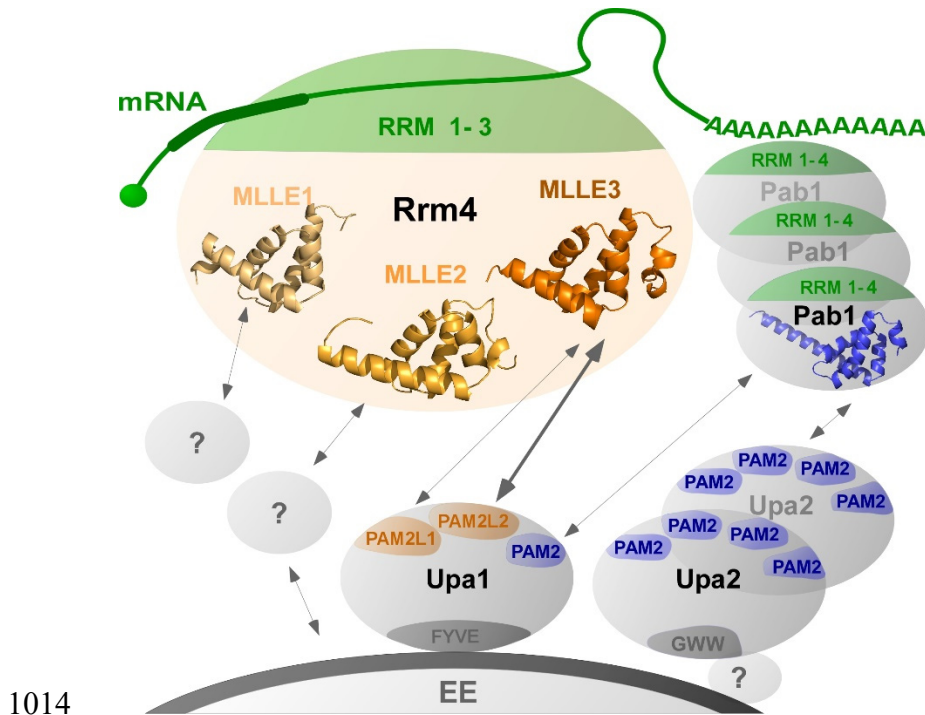

1015 **Figure 6. Schematic model of endosomal attachment of mRNPs via MLLE domains**

1016 Cargo mRNAs (green) are bound by the N-terminal RRM (1-3) domains of Rrm4 (green). The  
1017 C terminal MLLE domains (orange) form a binding platform: MLLE3<sup>Rrm4</sup> interacts with  
1018 PAM2L1<sup>Upa1</sup> and PAM2L2<sup>Upa1</sup>(orange), MLLE1 and -2<sup>Rrm4</sup> might interact with currently  
1019 unknown factors to support the endosomal binding. In particular, MLLE2<sup>Rrm4</sup> has an accessory  
1020 role during endosomal interaction. The four RRMs of Pab1 (green) interact with the poly(A)  
1021 tail, and the MLLE<sup>Pab1</sup> (blue) interacts with PAM2 of Upa1 and with the four PAM2 motifs of  
1022 Upa2 (dark blue), a dimerising scaffold protein. Upa1 is attached to endosomes via its FYVE  
1023 domain, and the C-terminal GWW motif of Upa2 is crucial for its endosomal binding.  
1024

1025

## Expanded View Figures

**A**

| Domain | Templates <sup>a</sup> | Rrm4 span | Template span | Identity (Similarity) <sup>b</sup> |
|--------|------------------------|-----------|---------------|------------------------------------|
| MLLE1  | 6H7A:A                 | 451-529   | 481-560       | 22.1 (38.4)                        |
|        | 3PTH:A                 | 451-528   | 544-618       | 18.4 (34.5)                        |
|        | 1I2T:A                 | 464-528   | 1009-1069     | 25.8 (40.9)                        |
| MLLE2  | 1I2T:A                 | 571-629   | 1009-1069     | 23.8 (44.4)                        |
|        | 3KTP:A                 | 550-631   | 554-620       | 17.6 (35.3)                        |
|        | 3KUR:A                 | 550-627   | 554-616       | 18.5 (37.0)                        |
| MLLE3  | 2X04:A                 | 712-791   | 540-616       | 30.6 (44.7)                        |
|        | 3KUR:A                 | 716-791   | 544-616       | 32.9 (45.6)                        |
|        | 3KTP:A                 | 716-791   | 544-616       | 32.9 (45.6)                        |

a. PDB ID and chain identifier. b. in percentage

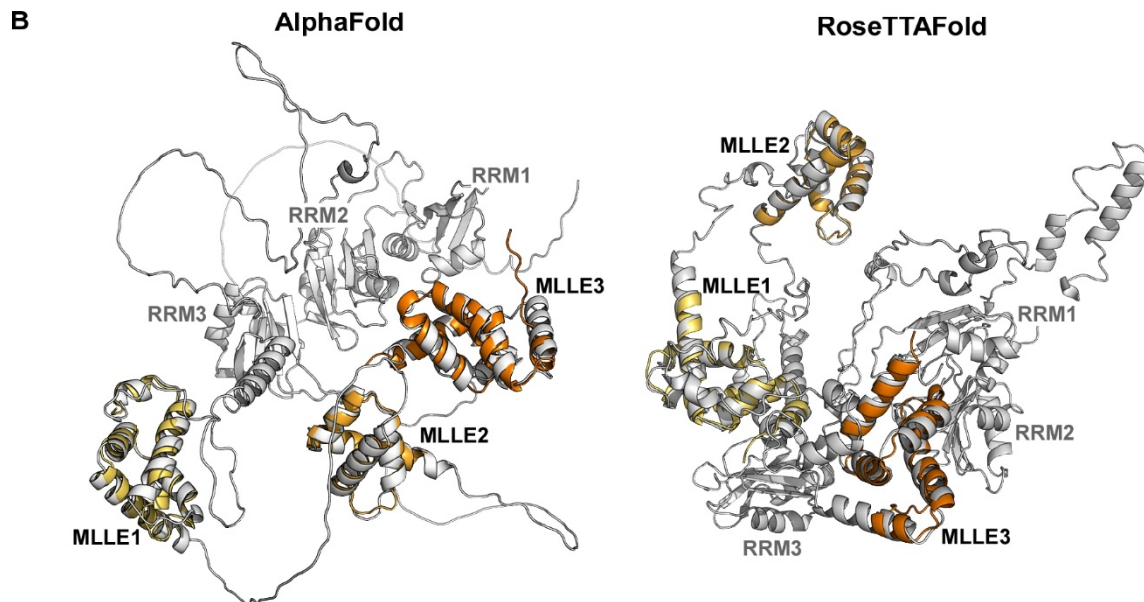

1026

1027 **Figure EV1. The presence of three MLLEs is verified by additional modelling predictions.**

1028 (A) Compilation of MLLE sequences used for modelling with the highest similarity of MLLE1-  
1029 3<sup>Rrm4</sup>. (B) Structural models obtained with TopModel overlaid to Rrm4 full-length models  
1030 obtained with the recently available tools as indicated. Natural alignments between  
1031 corresponding MLLE domains have an RMSD < 2Å, mutually confirming the quality of the  
1032 independently modelled structures. The differences in the relative domain arrangements in both  
1033 full-length models and the disordered regions in between the domains suggest a high mobility  
1034 within Rrm4.

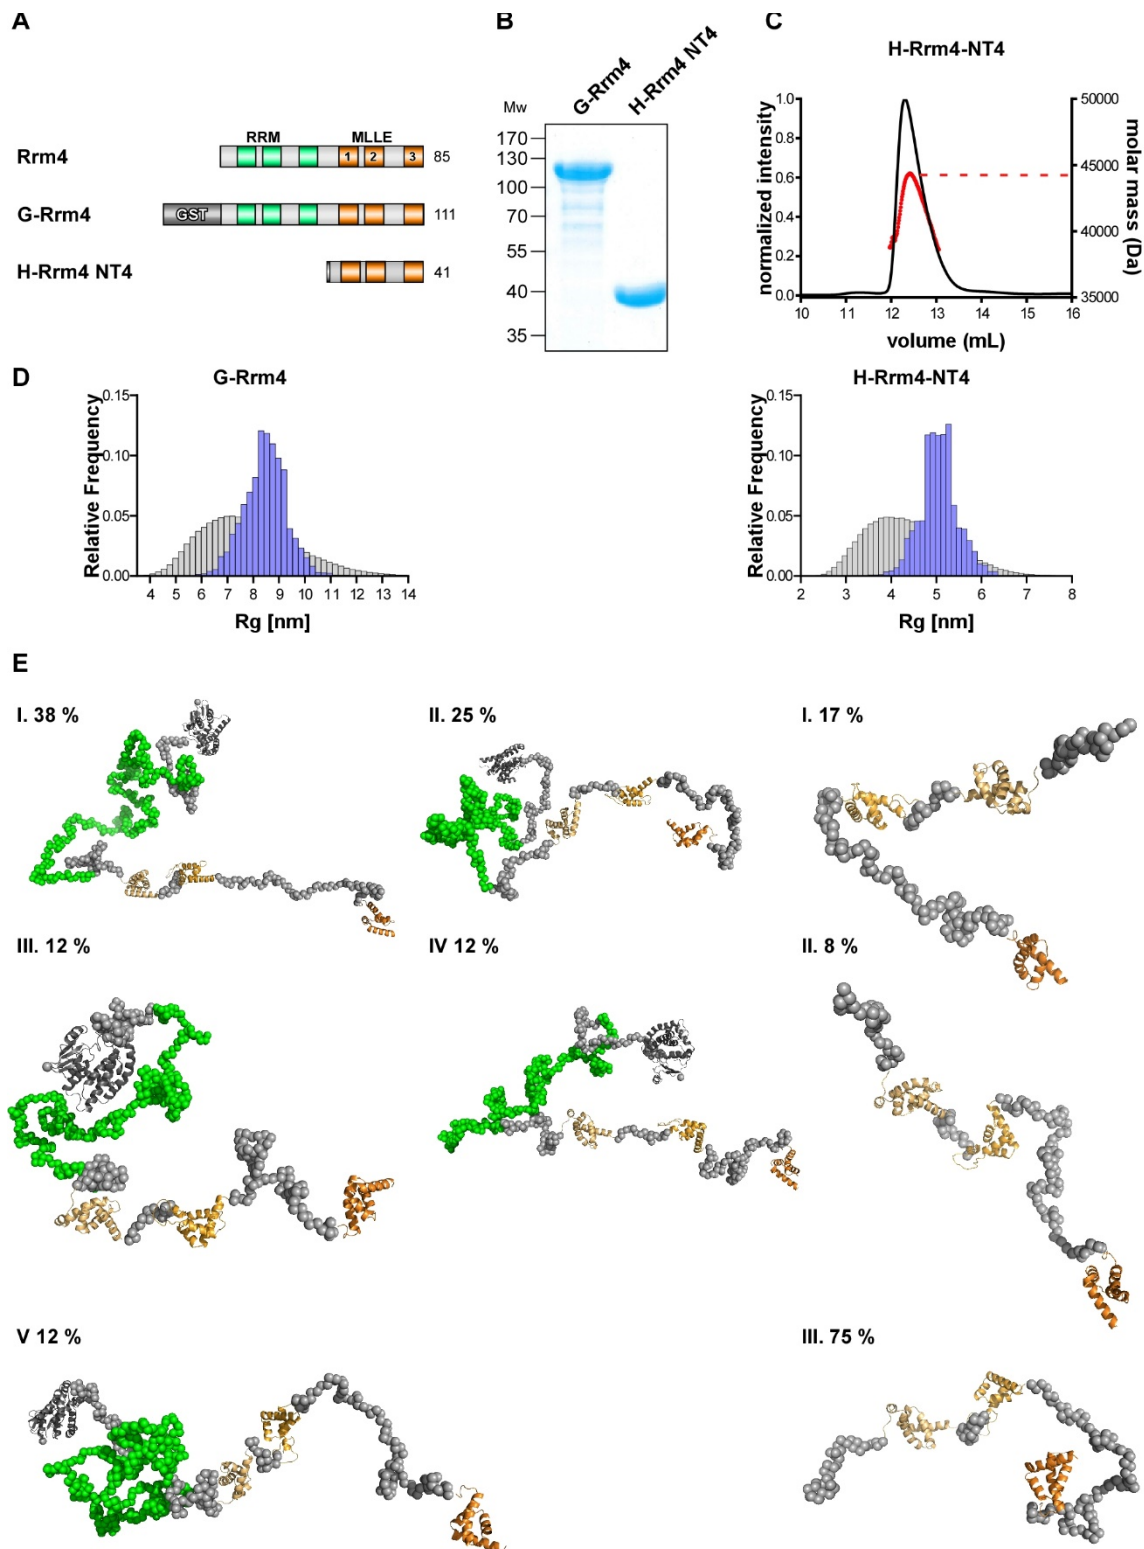

1035

1036 **Figure EV2. The three MLEs of Rrm4 are located in a flexible C-terminal region.**

1037 (A) Schematic representation of protein variants drawn to scale (molecular weight in kilo  
 1038 Dalton indicated next to protein bar ) using the following coloring: dark green, RNA recognition  
 1039 motif (RRM); orange, MLE<sup>Rrm4</sup> domains; (B) SDS PAGE analysis of purified G-Rrm4, H-  
 1040 Rrm4-NT4 used in crystallography and SAXS measurement. (C) MALS-SEC analysis of H-  
 1041 Rrm4-NT4. Graph shows the elution profile. Dotted line in red indicate the apparent molecular

1042 weight as observed in the light scattering. **(D)**  $R_g$  distribution calculated by EOM pool is shown  
1043 in grey bars and the selected models in blue bars *left* GST\_Rrm4 *right* H-Rrm4NT4 **(E)** *Left*  
1044 Selected models of the EOM analysis for GST-Rrm4. The MLLE subdomains and the GST are  
1045 shown in cartoon representation (MLLE1 in light orange, MLLE2 in orange, MLLE 3 in dark  
1046 orange) and the missing amino acids as grey spheres. **I:** The model has a  $R_g$  of 8.94 nm, a  $D_{max}$   
1047 of 29.22 nm with a volume fraction of~0.38. **II:** The model has a  $R_g$  of 8.75 nm, a  $D_{max}$  of 23.99  
1048 with a volume fraction of~0.25. **III:** The model has a  $R_g$  of 7.74 nm, a  $D_{max}$  of 25.90 with a  
1049 volume fraction of~0.12. **IV:** The model has a  $R_g$  of 8.33 nm, a  $D_{max}$  of 28.79 with a volume  
1050 fraction of~0.12. **V:** The model has a  $R_g$  of 9.14 nm, a  $D_{max}$  of 33.73 with a volume fraction  
1051 of~0.12. *Right* Selected models of the EOM analysis for H-Rrm4NT4. The MLLE subdomains  
1052 are shown in cartoon representation (MLLE1 in light orange, MLLE2 in orange, MLLE3 in  
1053 dark orange) and the missing amino acids as grey spheres. **I:** The model has a  $R_g$  of 5.12 nm,  
1054 a  $D_{max}$  of 15.56 with a volume fraction of~0.17. **II:** The model has a  $R_g$  of 5.90 nm, a  $D_{max}$  of  
1055 18.73 nm with a volume fraction of~0.08. **III:** The model has a  $R_g$  of 5.10 nm, a  $D_{max}$  of 16.43  
1056 nm with a volume fraction of~0.75.  
1057

Devan, Schott-Verdugo *et al.*

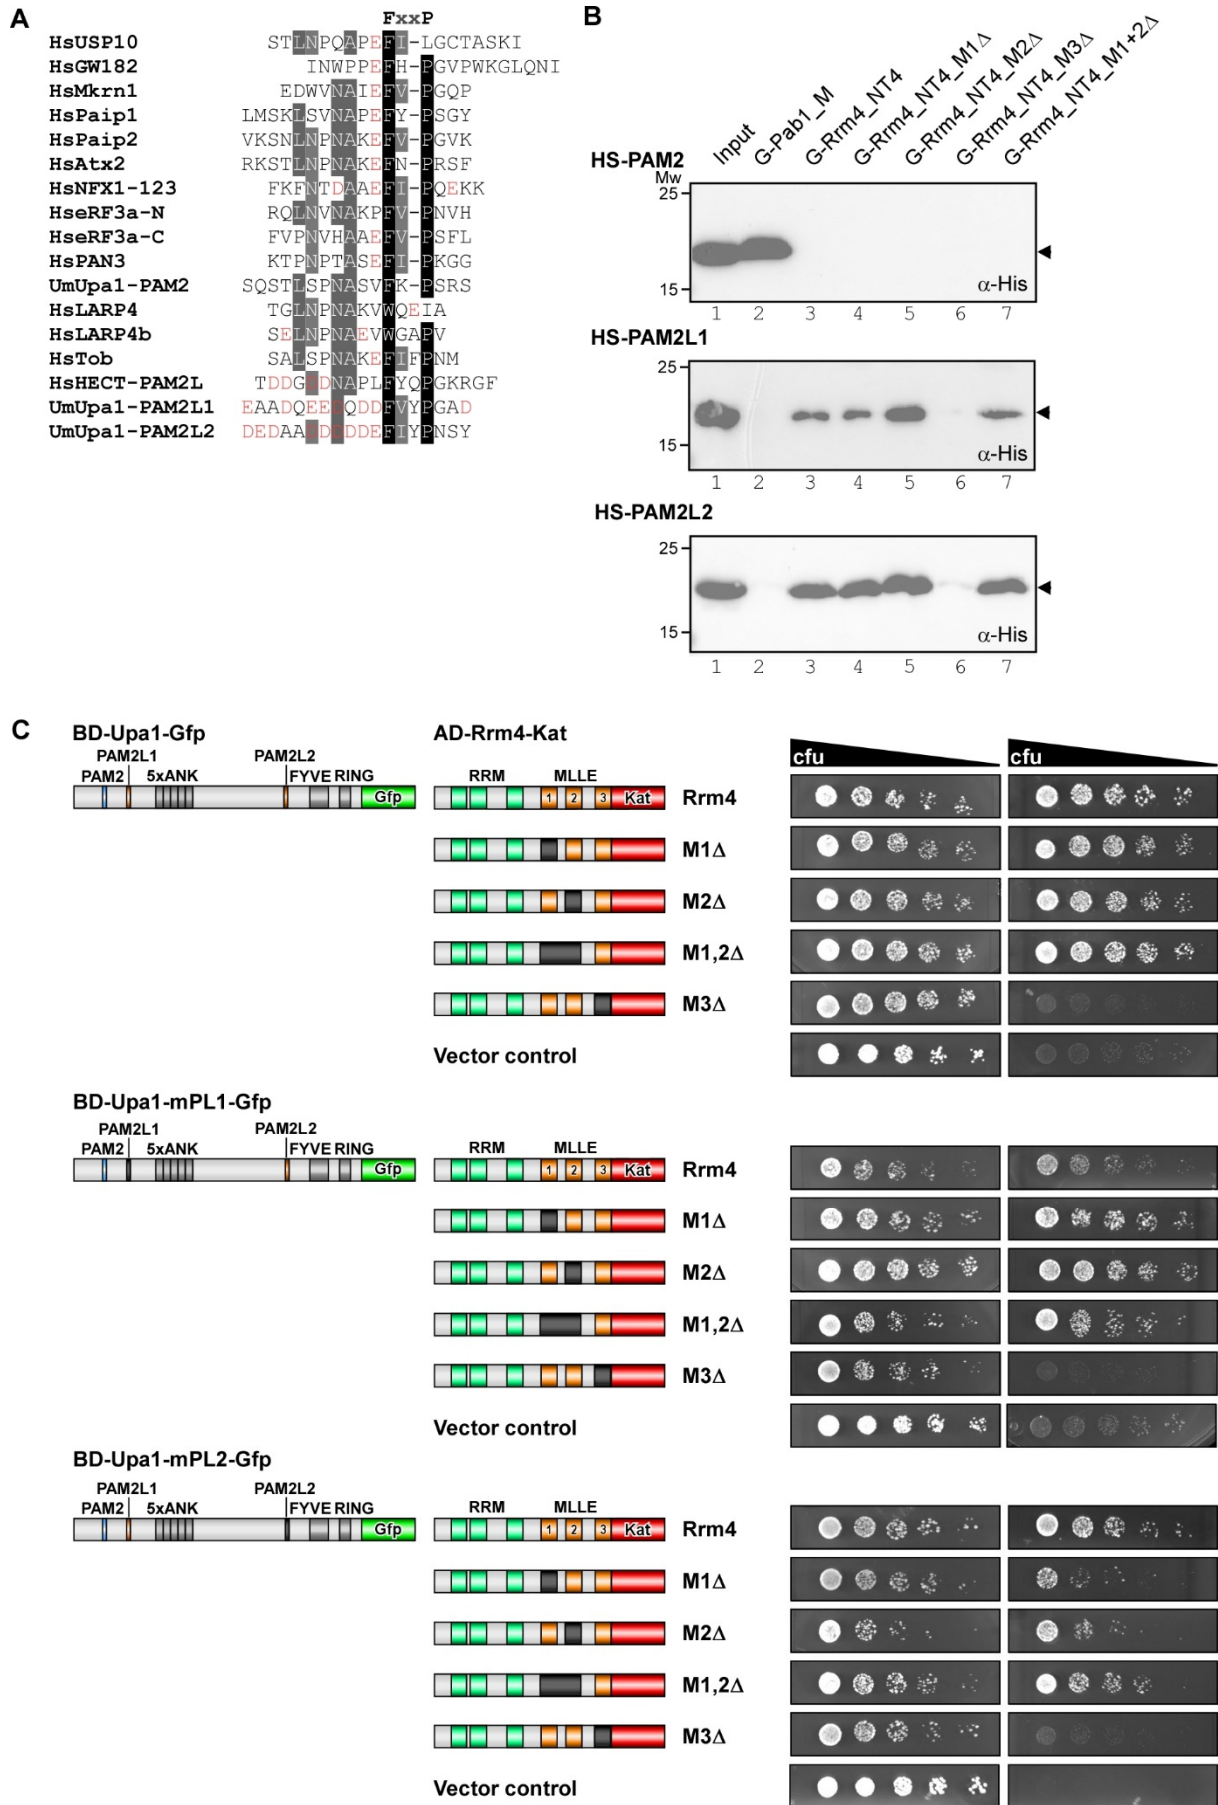

1058  
1059

Continued on next page

**C continued**

**BD-Upa1-mPL1,2-Gfp**

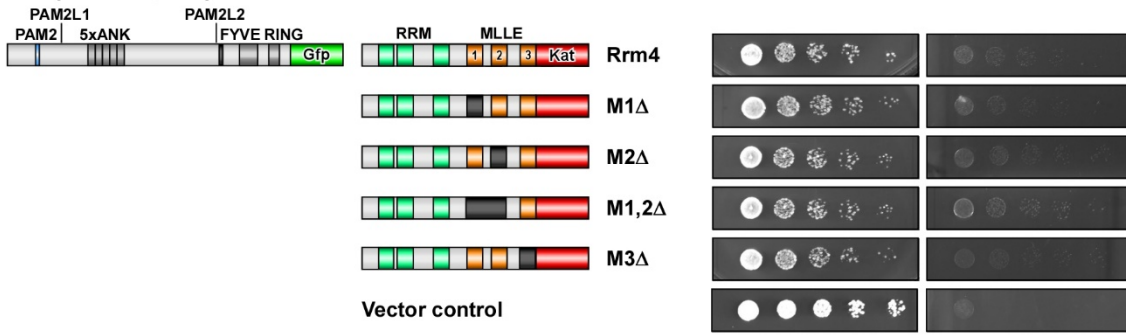

**BD-fusion**

**Vector control**

**Lamin C**

**p53**

**T - antigen**

**T - antigen**

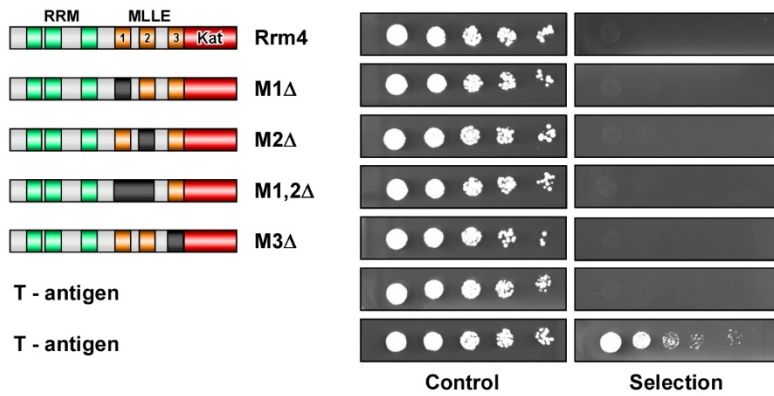

**D**

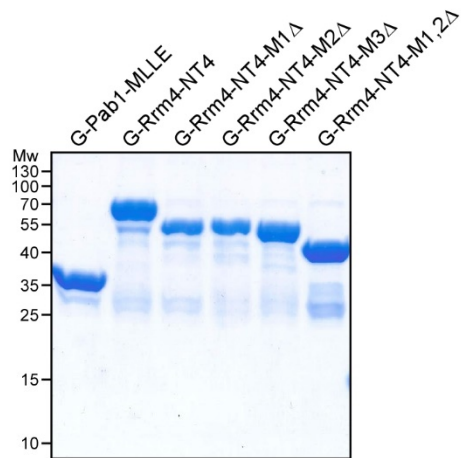

**E G-Pab1-MLE**

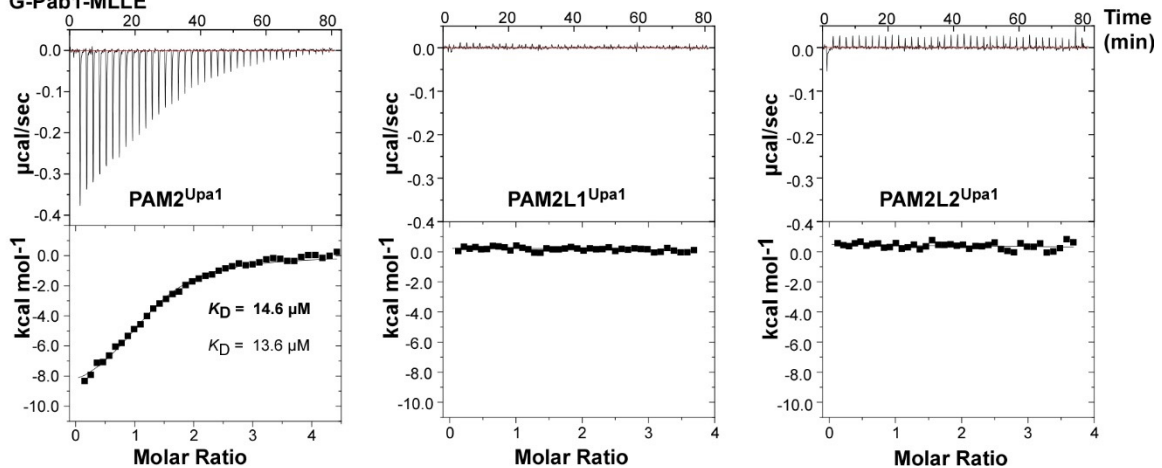

1060  
1061

Continued on next page



Devan, Schott-Verdugo *et al.*

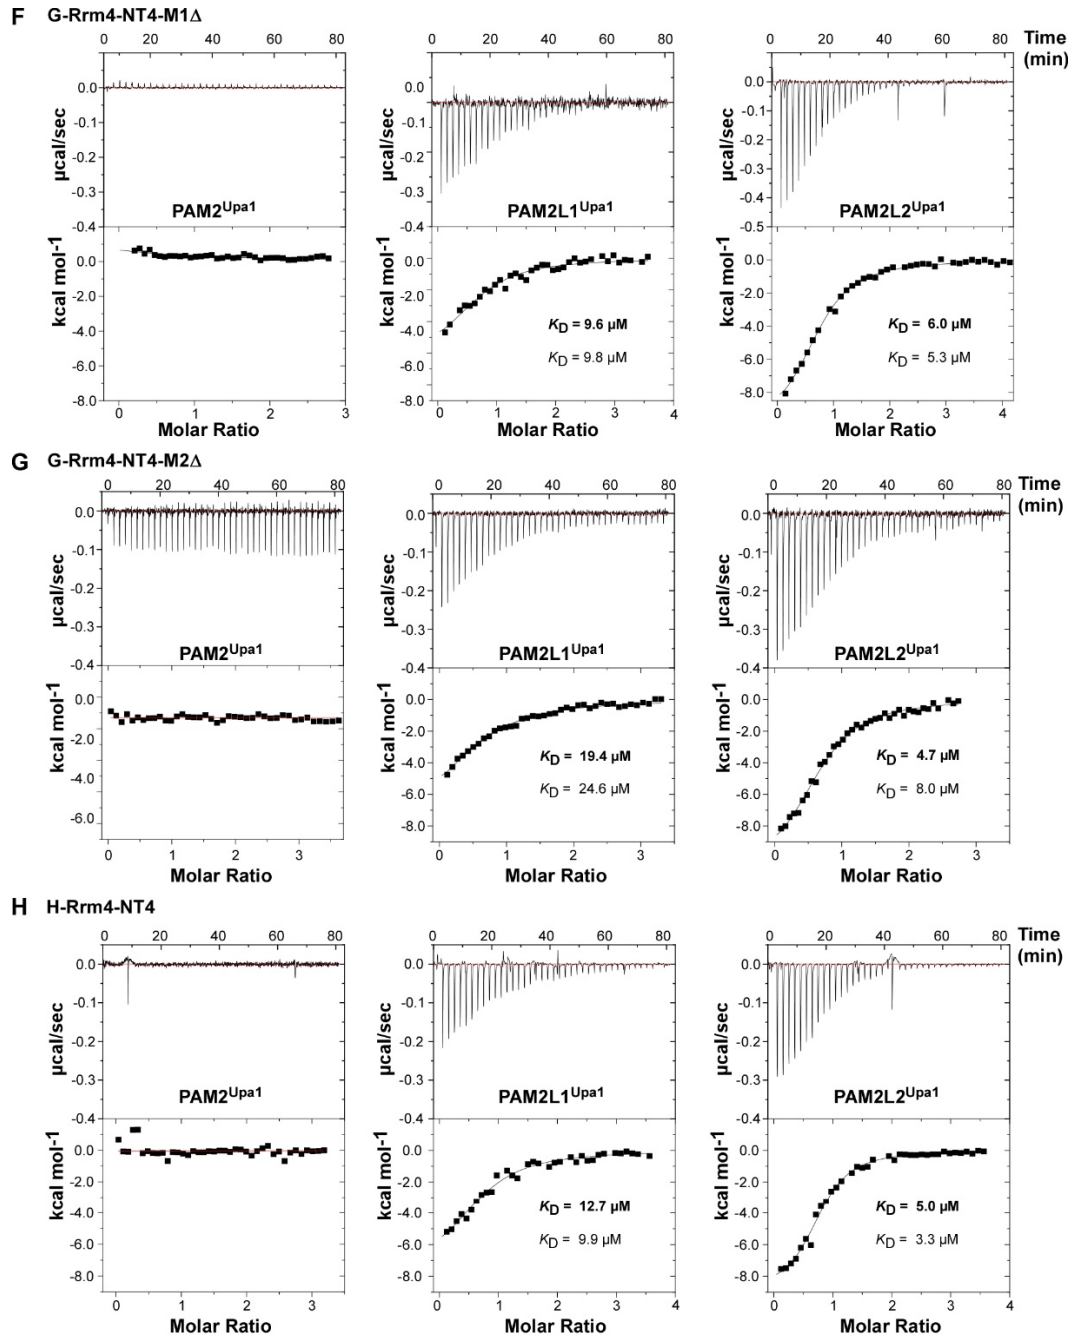

**I**

|                          | PAM2 <sup>Upa1</sup> | PAM2L1 <sup>Upa1</sup> | PAM2L2 <sup>Upa1</sup> |
|--------------------------|----------------------|------------------------|------------------------|
| G-Pab1-MLLE              | 14.6 / 13.6          | No binding             | No binding             |
| G-Rrm4-NT4               | No binding           | 14.9 / 14.0            | 5.1 / 5.9              |
| G-Rrm4-NT4-M1 $\Delta$   | No binding           | 9.6 / 9.8              | 6.0 / 5.3              |
| G-Rrm4-NT4-M2 $\Delta$   | No binding           | 19.4 / 24.6            | 4.7 / 8.0              |
| G-Rrm4-NT4-M3 $\Delta$   | No binding           | No binding             | No binding             |
| G-Rrm4-NT4-M1,2 $\Delta$ | No binding           | 13.3 / 12.0            | 5.3 / 6.4              |
| H-Rrm4-NT4               | No binding           | 12.7 / 9.9             | 5.0 / 3.3              |

1063 **Figure EV3. MLLE1<sup>Rrm4</sup>, -2<sup>Rrm4</sup> are not essential for PAM2L1<sup>Upa1</sup> and -L2<sup>Upa1</sup> binding.**

1064 (A) Comparison of PAM2 sequences found in Upa1 (UniprotKB ID A0A0D1E015) with those  
1065 of human proteins, such as Usp10 (Q14694), GW182 (Q9H074), Mkrn1 (Q9UHC7), Paip1  
1066 (Q9H074), Paip2 (Q9BPZ3), Atx2 (-Q99700), NFX (Q12986), eRF3 (P15170), PAN3  
1067 (Q58A45), LARP4 (Q71RC2), LARP4b (Q92615), Tob (P50616), HECT (O95071), Asp and  
1068 Glu are indicated in red stressing the highly negative charges in PAM2L sequences. (B)  
1069 Western blot analysis of GST co-purification experiments with components expressed in *E.*  
1070 *coli*: N-terminal Hexa-Histidine-SUMO-tagged PAM2 variants were pulled down by N-  
1071 terminal GST fused MLLE variants of Rrm4 and Pab1. Experiment was performed with the  
1072 soluble fraction of *E. coli* cell lysate to demonstrate specific binding. Results were analysed  
1073 with  $\alpha$ His immunoblotting (C) Yeast two-hybrid analyses with schematic representation of  
1074 protein variants tested on the left. Cultures were serially diluted 1:5 (decreasing colony-forming  
1075 units, cfu) and spotted on respective selection plates controlling transformation and assaying  
1076 reporter gene expression (see Materials and methods). (D) SDS-PAGE analysis of purified  
1077 GST-MLLE variants used in ITC experiments (E-H) Representative isothermal titration  
1078 calorimetry (ITC) binding curves of MLLE domains. Experiments were performed using GST  
1079 or hexa-histidine-tagged MLLE variants and synthetic PAM2 peptide variants.  $K_D$  values of  
1080 two independent measurements are given (values corresponding to the indicated data are given  
1081 in bold). (I) Summary of ITC results shown in Fig. 3 and Fig. EV3.  $K_D$  values are given in  $\mu$ M.  
1082

Devan, Schott-Verdugo *et al.*

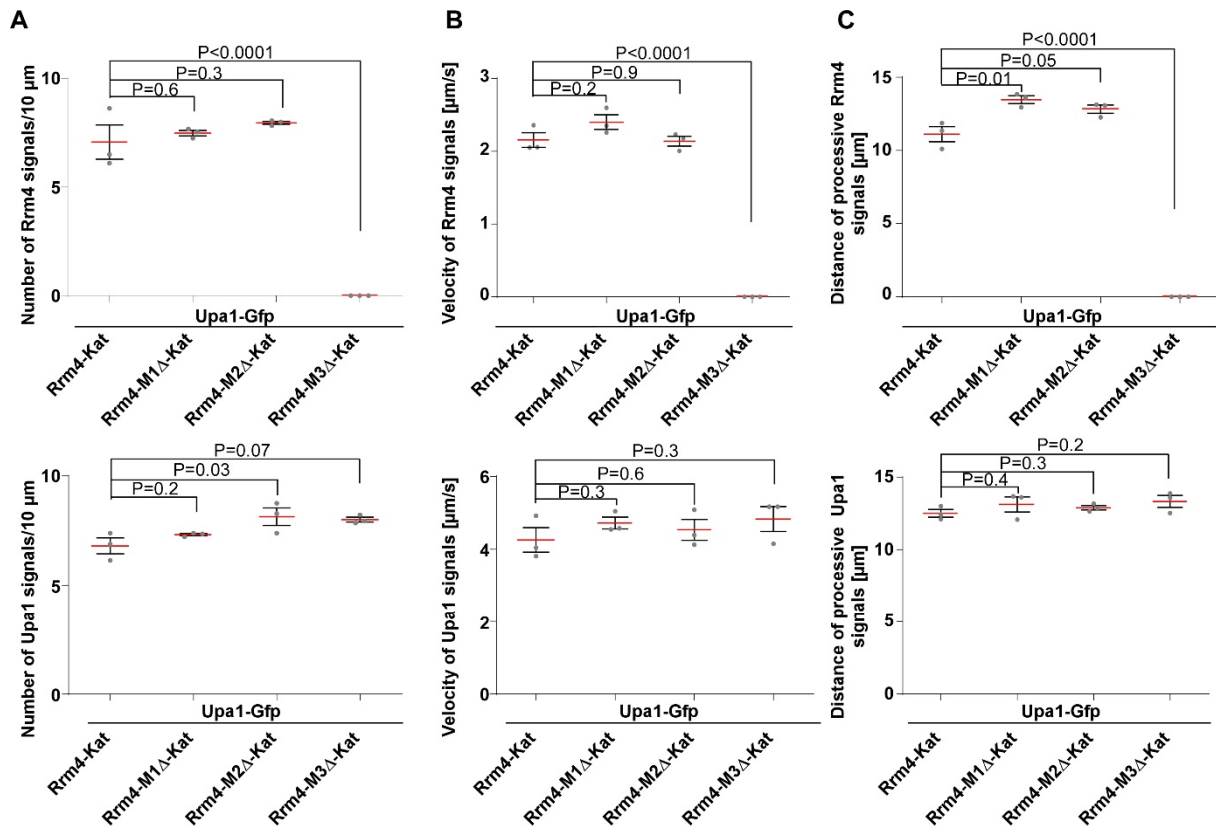

1083

1084 **Figure EV4. Deletion of MLL3<sup>Rrm4</sup> abolishes endosomal movement of Rrm4**

Devan, Schott-Verdugo *et al.*

1085 (A-C) Quantification of processive Rrm4-Kat (top) and Upa1-Gfp signals (bottom; (A)),  
1086 velocity of fluorescent Rrm4-Kat (top) and Upa1-Gfp signals (bottom; (B)) and the travelled  
1087 distance of processive Rrm4-Kat (top) and Upa1-Gfp signals (bottom; (C)); per 10  $\mu\text{m}$  of hyphal  
1088 length; only particles with a processive movement of  $> 5 \mu\text{m}$  were conducted; data points  
1089 representing mean from  $n=3$  independent experiments, with mean of means, red line and SEM;  
1090 unpaired two-tailed Student's t-test ( $\alpha<0.05$ ), for each experiment at least 25 hyphae were  
1091 analysed per strain). (D) Summary of the *in vivo* analysis is shown in Fig. 4,5 and Fig. EV5A-  
1092 C.





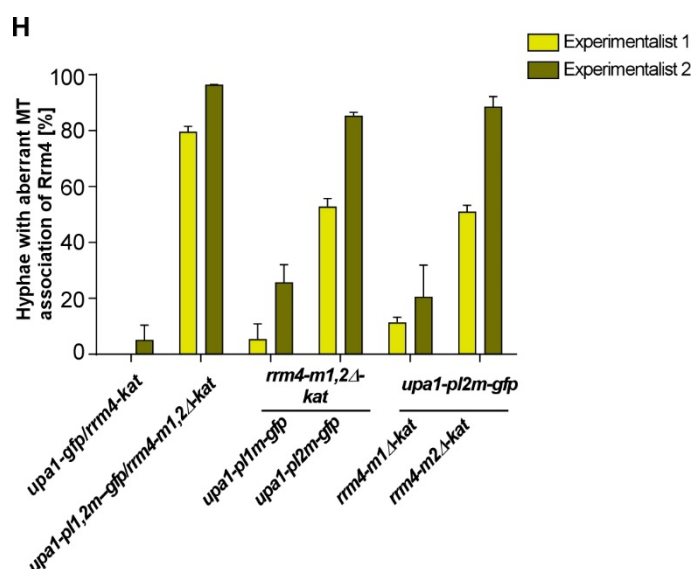

1097

1098 **Figure EV5. Deletion of *MLLE1<sup>Rrm4</sup>* and -2 cause aberrant staining of microtubules**

1099 (A) Growth of AB33 derivatives in their hyphal form (6 h.p.i.; size bar 10  $\mu$ m). Growth  
 1100 direction is marked by arrows. (B) Quantification of hyphal growth of AB33 derivatives shown  
 1101 in panel A (6 h.p.i.): unipolarity, bipolarity and basal septum formation were quantified (error  
 1102 bars, SEM.; n = 3 independent experiments, > 100 hyphae were analysed per strain; For  
 1103 statistical evaluation, the percentage of uni- and bipolarity was investigated by using unpaired  
 1104 two-tailed Student's t-test ( $\alpha < 0.05$ ). (C) Micrograph and Kymograph of AB33 hyphae  
 1105 derivatives (6 h.p.i.) expressing red and green fluorescent proteins as indicated. Fluorescence  
 1106 signals were detected simultaneously using dual-view technology (arrow length on the left and  
 1107 bottom indicates time and distance, respectively). Processive co-localising signals are marked  
 1108 by red arrowheads. Aberrant microtubule staining is indicated by a yellow arrowhead. (D-E)  
 1109 Quantification of processive Rrm4-Kat signals (left), velocity of fluorescent Rrm4-Kat (middle)  
 1110 and the travelled distance of processive Rrm4-Kat signals (right) related to figure 5 C and  
 1111 EV5C, respectively ( per 10  $\mu$ m of hyphal length; only particles with a processive movement  
 1112 of > 5  $\mu$ m were conducted; data points representing mean from n = 3 independent experiments,  
 1113 with mean of means, red line and SEM; unpaired two-tailed Student's t-test ( $\alpha < 0.05$ ), for each  
 1114 experiment at least 25 hyphae were analysed per strain). (F) Benomyl treatment is shown in  
 1115 micrograph and kymograph of AB33 hyphae derivatives (6 h.p.i.) expressing red and green  
 1116 fluorescent proteins. Processive signals, as well as static signals, post benomyl treatment are  
 1117 marked by red arrowheads. Aberrant microtubule staining is indicated by a yellow arrowhead.  
 1118 (G) Western blot analysis of the expression levels of Rrm4 and Upa1 variants 6 h.p.i. of hyphal  
 1119 growth. Rrm4 and Upa1 variants were detected via mKate2 and Gfp, respectively. Actin was  
 1120 detected as loading control. Bands representing full-length proteins are marked with arrows.  
 1121 (H) Evaluation of the most important strains showing aberrant microtubule staining analysed  
 1122 by two experimentalists (we used the data obtained by the more experienced microscopist in  
 1123 Fig. 5D; see Materials and methods).

1124
